# Supplementary material for: One step synthesis of benzoxazepine derivatives via a PPh3 catalyzed aza-MBH domino reaction between salicyl N-tosylimines and allenoates
Source: Royal Society of Chemistry journal article supplement (doi:10.1039/c3cc46379f), 2013-01-01
Supplement: c3cc46379f.pdf [file c3cc46379f.pdf]

## Supplementary Information for

### One step synthesis of benzoxiazepine derivatives via PPh<sub>3</sub> catalyzed aza-MBH domino reaction between salicyl *N*-tosylimines and allenates

Hongxia Zhao,<sup>a</sup> Xiangtai Meng<sup>a,b</sup> and You Huang\*<sup>a</sup>

<sup>a</sup> State Key Laboratory and Institute of Elemento-organic Chemistry, Nankai University,  
Tianjin 30071, China

E-mail: [hyou@nankai.edu.cn](mailto:hyou@nankai.edu.cn)

<sup>b</sup> Department of Applied Chemistry, Tianjin University of Technology, Tianjin 300384,  
PR China

## Contents

|                                                                                               |                                      |
|-----------------------------------------------------------------------------------------------|--------------------------------------|
| 1. Contents .....                                                                             | <b>SError! Bookmark not defined.</b> |
| 2. General Information .....                                                                  | S2                                   |
| 3. General procedure for the synthesis of methyl-2,3- dienoic acid ethyl ester <b>1</b> ..... | S2                                   |
| 4. General procedure for the synthesis of <i>N</i> -Tosylaldimines .....                      | S2                                   |
| 5. General procedure for the synthesis of benzoxiazepine derivatives .....                    | S3                                   |
| 6. Analytical Data for Compounds <b>3</b> .....                                               | S3                                   |
| 7. NMR spectra for all new compounds.....                                                     | S11                                  |
| 8. Crystal structure of <b>3g</b> .....                                                       | S26                                  |

## 2. General Information

All the solvents were purified according to standard procedures. The  $^1\text{H}$  NMR and Spectra were recorded at 400MHz,  $^{13}\text{C}$  NMR was recorded at 100MHz.  $^1\text{H}$  and  $^{13}\text{C}$  NMR Chemical shifts were calibrated to tetramethylsilane as an external reference. Coupling constants are given in Hz. The following abbreviations are used to indicate the multiplicity: s, singlet; d, doublet; t, triplet; q, quartet; m, multiplet; HRMS were recorded on an Agilent Technologies 6520 Accurate-Mass Q-TOF LC/MS. Melting points were measured on a RY-I apparatus and are reported uncorrected.

## 3. General procedure for the synthesis of 5-Phenyl-penta-2,3-dienoic acid ethyl ester 1.<sup>1</sup>

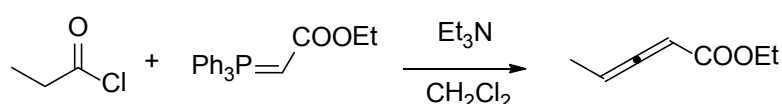

Allenoate 1 is a known compound and synthesized according to a similar method developed by Hansen.<sup>2</sup> To a solution of (ethoxycarbonylmethylene)-triphenylphosphorane (0.1 mol) in dichloromethane (400 mL) was added 1.1 equivalent of triethylamine (0.11 mmol). After stirred for about 15 minutes, 1.1 equivalent of propanoyl chloride (0.11 mmol) was added dropwise. Then the reaction mixture was allowed to be warmed up to room temperature and stirred overnight. The resulting mixture was carefully evaporated to remove most of the solvent, and the residue was extracted by petroleum ether (b.p. 30-60 °C, 5 × 100 mL). The combined extracting was concentrated and the residue was subjected to column chromatography (eluant: 5% EtOAc in petroleum ether) to provide the allenoate 2 as yellow oil.

## 4. General procedure for the synthesis of *N*-Tosylaldimines

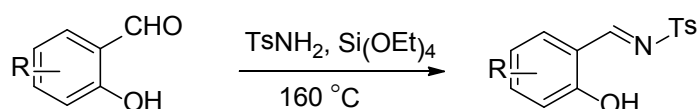

The aldehyde (4.8 mmol), *p*-toluenesulfonamide (4.8 mmol), and Si(OEt)<sub>4</sub> (5.4 mmol)

were combined in a flask equipped with a still head and heated at 160 °C under nitrogen for 6 hours, during which time EtOH collected in the receiving flask. On cooling, the reaction mixture was suspended in Et<sub>2</sub>O (50 ml), filtered, and the precipitate washed with Et<sub>2</sub>O, the crude product was then recrystallized (EtOAc/hexanes).<sup>3</sup>

## 5. General procedure for the synthesis of benzoxiazepine derivatives

Imine ((0.30 mmol, 1.00 equiv) and PPh<sub>3</sub> (0.50 equiv) were dissolved in dry CH<sub>2</sub>Cl<sub>2</sub> (3.0 mL), and then, methyl-penta-2,3-dienodate (3.00 equiv) was added to this solution, the reaction mixture was stirred at 40 °C. After complete conversion, as indicated by TLC, all volatiles were removed in vacuo and the residue was purified by column chromatography (Petroleum ether(60-90 °C)/ethyl acetate = 10:1).

## 6. Analytical Data for Compounds 3

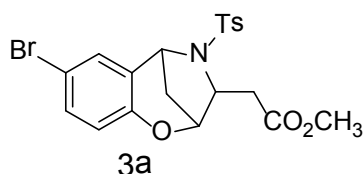

**3a** methyl 2-(7-bromo-4-tosyl-2,3,4,5-tetrahydro-2,5-methanobenzo[f][1,4]oxazepin-3-yl)acetate

Mp 158-160 °C

<sup>1</sup>H NMR (400 M, CDCl<sub>3</sub>, TMS) δ 7.34 (d, 2H, J=8.4, Ph-H) 7.11(d, 1H, J=2.4, Ph-H) 7.06-7.02(m, 3H, Ph-H) 6.29(d, 1H, J=8.8, Ph-H) 4.82(d, 1H, J=4.8, CH) 4.70(s, 1H, CH) 4.16(dd, 1H, J=3.2, 10.8, CH) 3.75(s, 3H, CH<sub>3</sub>) 3.27(dd, 1H, J=3.6, 16.8, CH<sub>2</sub>) 2.45(dd, 1H, J=10.4, 17.2, CH<sub>2</sub>) 2.37(ddd, 1H, J=2.4,4.8, 12.4, CH<sub>2</sub>) 2.31(s, 3H, CH<sub>3</sub>) 2.09(d, 1H, J=12.4, CH<sub>2</sub>). <sup>13</sup>CNMR (100 M, CDCl<sub>3</sub>, TMS) δ 171.0, 150.9, 143.4, 134.3, 132.2, 130.7, 129.0, 127.8, 125.0, 117.5, 111.9, 79.6, 64.0, 57.5, 52.0, 38.5, 29.4, 21.5. HRMS(ESI/[M+H]<sup>+</sup>) Calcd. for: C<sub>20</sub>H<sub>21</sub>BrNO<sub>5</sub>S 466.0318, found 466.0310.

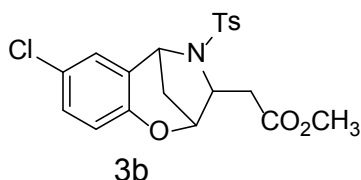

**3b** methyl 2-(7-chloro-4-tosyl-2,3,4,5-tetrahydro-2,5-methanobenzo[f][1,4]oxazepin-3-yl)acetate  
Mp 174-177°C

<sup>1</sup>H NMR (400 M, CDCl<sub>3</sub>): δ7.34 (d, 2H, J=8.4, Ph-H) 7.04(d, 2H, J=8.0, Ph-H) 6.97(d, 1H, J=2.4, Ph-H) 6.90(dd, 1H, J=2.4, 8.4, Ph-H) 6.35(d, 1H, J=8.4, Ph-H) 4.82(d, 1H, J=4.8, CH) 4.70(s, 1H, CH) 4.15(dd, 1H, J=3.6, 10.8, CH) 3.75(s, 3H, CH<sub>3</sub>) 3.26(dd, 1H, J=3.6, 16.8, CH<sub>2</sub>) 2.45(dd, 1H, J=10.8, 16.8, CH<sub>2</sub>) 2.36(ddd, 1H, J=2.8, 5.2, 12.8, CH<sub>2</sub>) 2.30(s, 3H, CH<sub>3</sub>) 2.10(d, 1H, J=12.4, CH<sub>2</sub>). <sup>13</sup>C NMR (100 M, CDCl<sub>3</sub>): δ171.0, 150.3, 143.4, 134.3, 129.3, 128.9, 127.9, 127.7, 124.6, 124.4, 117.0, 79.6, 64.0, 57.5, 52.0, 38.5, 29.4, 21.4. HRMS(ESI/[M+H]<sup>+</sup>) Calcd. for: C<sub>20</sub>H<sub>21</sub>ClNO<sub>5</sub>S 422.0823, found 422.0823.

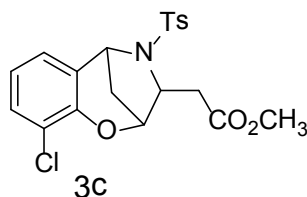

**3c** methyl 2-(9-chloro-4-tosyl-2,3,4,5-tetrahydro-2,5-methanobenzo[f][1,4]oxazepin-3-yl)acetate  
Mp 172-174 °C

<sup>1</sup>H NMR (400 M, CDCl<sub>3</sub>): δ7.16 (d, 2H, J=8.0, Ph-H) 7.02(dd, 1H, J=1.6, 8.0, Ph-H) 6.96(dd, 1H, J=1.6, 7.6, Ph-H) 6.91(d, 2H, J=8.0, Ph-H) 6.65(t, 1H, J=8.0, 15.6, Ph-H) 4.85(d, 1H, J=5.2, CH) 4.77(s, 1H, CH) 4.07(dd, 1H, J=3.6, 10.4, CH) 3.68(s, 3H, CH<sub>3</sub>) 3.09(dd, 1H, J=3.6, 20.0, CH<sub>2</sub>) 2.42-2.33(m, 2H, CH<sub>2</sub>&CH<sub>2</sub>) 2.24(s, 3H, CH<sub>3</sub>) 2.04(d, 1H, J=12.8, CH<sub>2</sub>). <sup>13</sup>C NMR (100 M, CDCl<sub>3</sub>): δ170.7, 147.9, 143.4, 134.1, 130.3, 128.9, 127.5, 126.3, 125.3, 120.6, 120.4, 80.1, 64.0, 57.7, 52.1, 38.6, 29.6, 21.4. HRMS(ESI/[M+H]<sup>+</sup>) Calcd. for: C<sub>20</sub>H<sub>21</sub>ClNO<sub>5</sub>S 422.0823, found 421.0822.

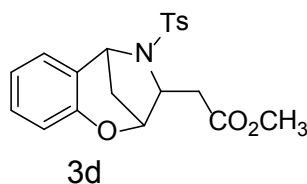

**3d** methyl 2-(4-tosyl-2,3,4,5-tetrahydro-2,5-methanobenzo[f][1,4]oxazepin-3-yl)acetate  
Mp 120-130 °C

$^1\text{H}$  NMR (400 M,  $\text{CDCl}_3$ ):  $\delta$ 7.22 (d, 2H,  $J=8.0$ , Ph-H) 7.13(dd, 1H,  $J=1.6$ , 7.2, Ph-H) 7.03(td, 1H,  $J=1.6$ , 7.6, Ph-H) 6.94(d, 2H,  $J=8.4$ , Ph-H) 6.77(td, 1H,  $J=1.2$ , 7.6, Ph-H) 6.43(d, 1H,  $J=8.0$ , Ph-H) 4.92(d, 1H,  $J=4.8$ , CH) 4.67(s, 1H, CH) 4.02(dd, 1H,  $J=3.2$ , 10.4, CH) 3.74(s, 1H,  $\text{CH}_3$ ) 3.21(dd, 1H,  $J=3.6$ , 16.8,  $\text{CH}_2$ ) 2.43(dd, 1H,  $J=10.8$ , 16.8,  $\text{CH}_2$ ) 2.37(ddd, 1H,  $J=2.8$ , 5.2, 12.4,  $\text{CH}_2$ ) 2.30(s, 3H,  $\text{CH}_3$ ) 2.10(d, 1H,  $J=12.4$ ,  $\text{CH}_2$ ).  $^{13}\text{C}$  NMR (100 M,  $\text{CDCl}_3$ ):  $\delta$ 171.0, 152.0, 143.0, 130.2, 130.0, 129.8, 128.9, 127.8, 127.3, 123.7, 119.9, 115.7, 79.4, 63.8, 58.2, 52.0, 38.4, 29.7, 21.4. HRMS(ESI/[ $\text{M}+\text{H}$ ] $^+$ ) Calcd. for:  $\text{C}_{20}\text{H}_{22}\text{NO}_5\text{S}$  388.1213, found 388.1215.

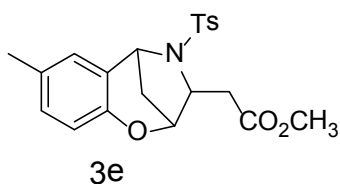

**3e** methyl 2-(7-methyl-4-tosyl-2,3,4,5-tetrahydro-2,5-methanobenzo[f][1,4]oxazepin-3-yl)acetate  
Mp 188-190 °C

$^1\text{H}$  NMR (400 M,  $\text{CDCl}_3$ ):  $\delta$ 7.27-7.25 (m, 2H, Ph-H) 6.95(d, 2H,  $J=8.4$ , Ph-H) 6.85(d, 1H,  $J=1.6$ , Ph-H) 6.78(dd, 2H,  $J=2.0$ , 8.0, Ph-H) 6.32(d, 1H,  $J=8.0$ , Ph-H) 4.84(d, 1H,  $J=4.8$ , CH) 4.65(s, 1H, CH) 4.07(dd, 1H,  $J=3.6$ , 10.8, CH) 3.74(s, 3H,  $\text{CH}_3$ ) 3.23(dd, 1H,  $J=3.6$ , 16.8,  $\text{CH}_2$ ) 2.43(dd, 1H,  $J=10.8$ , 16.4,  $\text{CH}_2$ ) 2.34(ddd, 1H,  $J=2.8$ , 5.2, 12.4,  $\text{CH}_2$ ) 2.27(s, 3H,  $\text{CH}_3$ ) 2.23(s, 3H,  $\text{CH}_3$ ) 2.11(d, 1H,  $J=12.4$ ,  $\text{CH}_2$ ).  $^{13}\text{C}$  NMR (100 M,  $\text{CDCl}_3$ ):  $\delta$ 171.0, 149.6, 142.9, 134.5, 130.0, 128.9, 128.7, 128.6, 127.8, 123.0, 115.4, 79.4, 63.9, 58.2, 52.0, 38.5, 29.8, 21.4, 20.2. HRMS(ESI/[ $\text{M}+\text{H}$ ] $^+$ ) Calcd. for:  $\text{C}_{21}\text{H}_{24}\text{NO}_5\text{S}$  402.1370, found 402.1375.

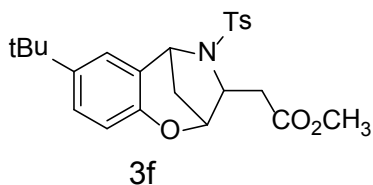

**3f** methyl 2-(7-(tert-butyl)-4-tosyl-2,3,4,5-tetrahydro-2,5-methanobenzo[f][1,4]oxazepin-3-yl)acetate  
 $^1\text{H}$  NMR (400 M,  $\text{CDCl}_3$ ):  $\delta$ 7.19 (d, 2H,  $J=8.4$ , Ph-H) 7.16(d, 1H,  $J=2.4$ , Ph-H) 7.61(dd, 1H,  $J=2.8$ , 8.8, Ph-H) 6.92(d, 2H,  $J=8.0$ , Ph-H) 6.35(d, 1H,  $J=8.4$ , Ph-H) 4.93(d, 1H,  $J=4.8$ , CH) 4.64(s, 1H, CH) 3.99(dd, 1H,  $J=3.6$ , 10.8, CH) 3.74(s, 3H,  $\text{CH}_3$ ) 3.22(dd, 1H,  $J=4.0$ , 16.8,  $\text{CH}_2$ ) 2.43(dd, 1H,  $J=10.8$ , 16.4,  $\text{CH}_2$ ) 2.35(ddd, 1H,  $J=2.8$ , 5.2, 12.4,  $\text{CH}_2$ )

2.27(s, 3H, CH<sub>3</sub>) 2.12(d, 1H, J=12.4, CH<sub>2</sub>) 1.33(s, 9H, CH<sub>3</sub>). <sup>13</sup>C NMR (100 M, CDCl<sub>3</sub>): δ171.0, 149.6, 142.8, 142.6, 134.3, 128.8, 127.7, 126.7, 124.9, 123.1, 115.1, 79.4, 63.7, 58.7, 52.0, 38.4, 34.1, 31.6, 29.9, 21.4. HRMS(ESI/[M+H]<sup>+</sup>) Calcd. for: C<sub>24</sub>H<sub>30</sub>NO<sub>5</sub>S 444.1839, found 444.1842.

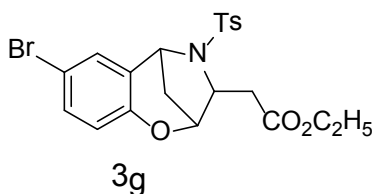

**3g** ethyl 2-(7-bromo-4-tosyl-2,3,4,5-tetrahydro-2,5-methanobenzo[f][1,4]oxazepin-3-yl)acetate

Mp 122-124 °C

<sup>1</sup>H NMR (400 M, CDCl<sub>3</sub>): δ7.35 (d, 2H, J=8.0, Ph-H) 7.12(d, 1H, J=2.0, Ph-H) 7.06-7.04(m, 3H, Ph-H) 6.30(d, 1H, J=8.4, Ph-H) 4.82(d, 1H, J=4.8, CH) 4.71(s, 1H, CH) 4.24-4.14(m, 3H, CH<sub>2</sub> &CH) 3.26(dd, 1H, J=3.6, 16.8, CH<sub>2</sub>) 2.47-2.36(m, 2H, CH<sub>2</sub>&CH<sub>2</sub>) 2.31(s, 3H, CH<sub>3</sub>) 2.10(d, 1H, J=12.4, CH<sub>2</sub>) 1.32(t, 3H, J=7.2, 14.0, CH<sub>3</sub>). <sup>13</sup>C NMR (100 M, CDCl<sub>3</sub>): δ170.6, 150.9, 143.3, 134.3, 132.2, 130.7, 128.9, 127.7, 125.0, 117.5, 111.9, 79.6, 64.1, 61.0, 57.5, 38.7, 29.4, 21.4, 14.2. HRMS(ESI/[M+Na]<sup>+</sup>) Calcd. for: C<sub>21</sub>H<sub>22</sub>BrNO<sub>5</sub>SNa 502.0294, found 502.0285.

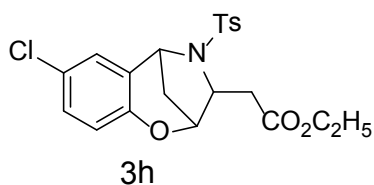

**3h** ethyl 2-(7-chloro-4-tosyl-2,3,4,5-tetrahydro-2,5-methanobenzo[f][1,4]oxazepin-3-yl)acetate

Mp. 137-139 °C

<sup>1</sup>H NMR (400 M, CDCl<sub>3</sub>): δ7.34 (d, 2H, J=8.0, Ph-H) 7.03(d, 2H, J=8.0, Ph-H) 6.98(d, 1H, J=2.4, Ph-H) 6.90(dd, 1H, J=2.4, 8.8, Ph-H) 6.35(d, 1H, J=8.8, Ph-h) 4.82(d, 1H, J=5.2, CH) 4.70(s, 1H, CH) 4.23-4.13(m, 3H, CH<sub>2</sub> &CH) 3.25(dd, 1H, J=3.2, 16.8, CH<sub>2</sub>) 2.46-2.34(m, 2H, CH<sub>2</sub>&CH<sub>2</sub>) 2.30(s, 3H, CH<sub>3</sub>) 2.10(d, 1H, J=12.4, CH<sub>2</sub>) 1.31(t, 3H, J=7.2, 14.4, CH<sub>3</sub>). <sup>13</sup>C NMR (100 M, CDCl<sub>3</sub>): δ170.6, 150.4, 143.3, 134.3, 129.2, 128.9, 127.9, 127.7, 124.6, 124.5, 117.0, 79.6, 64.1, 61.0, 57.5, 38.7, 29.4, 21.4, 14.2. HRMS(ESI/[M+Na]<sup>+</sup>) Calcd. for: C<sub>21</sub>H<sub>22</sub>ClNO<sub>5</sub>SNa 458.0799, found 458.0797.

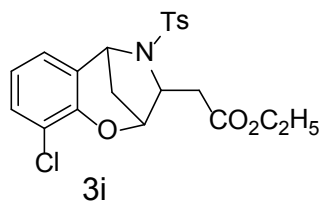

**3i** ethyl 2-(9-chloro-4-tosyl-2,3,4,5-tetrahydro-2,5-methanobenzo[f][1,4]oxazepin-3-yl)acetate

Mp 154-156 °C

<sup>1</sup>H NMR (400 M, CDCl<sub>3</sub>): δ7.23 (d, 2H, J=7.6, Ph-H) 7.09(d, 1H, J=8.0, Ph-H) 7.03(d, 1H, J=7.2, Ph-H) 6.98(d, 2H, J=7.6, Ph-H) 6.71(t, 1H, J=7.6, 15.2, Ph-H) 4.92(d, 1H, J=4.8, CH) 4.83(s, 1H, CH) 4.20 (q, 2H, J=6.8, 14.0, CH<sub>2</sub>) 4.14(dd, 1H, J=4.0, 11.2, CH) 3.14(dd, 1H, J=3.6, 16.4, CH<sub>2</sub>) 2.46-2.40(m, 2H, CH<sub>2</sub>&CH<sub>2</sub>) 2.31(s, 3H, CH<sub>3</sub>) 2.11(d, 1H, J=12.8, CH<sub>2</sub>) 1.31(t, 3H, J=7.2, 14.4 CH<sub>3</sub>). <sup>13</sup>C NMR (100 M, CDCl<sub>3</sub>): δ170.3, 147.9, 143.4, 134.1, 130.3, 128.9, 127.5, 126.4, 125.3, 120.6, 120.4, 80.1, 64.1, 61.0, 57.7, 38.8, 29.6, 21.4, 14.2. HRMS(ESI/[M+Na]<sup>+</sup>) Calcd. for: C<sub>21</sub>H<sub>22</sub>ClNO<sub>5</sub>SNa 458.0799, found 458.798.

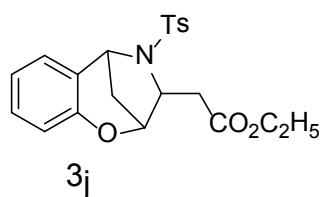

**3j** ethyl 2-(4-tosyl-2,3,4,5-tetrahydro-2,5-methanobenzo[f][1,4]oxazepin-3-yl)acetate

Mp 121-123 °C

<sup>1</sup>H NMR (400 M, CDCl<sub>3</sub>): δ7.22 (d, 2H, J=7.6, Ph-H) 7.13(d, 1H, J=7.2, Ph-H) 7.03(t, 1H, J=7.6, 15.6, Ph-H) 6.94(d, 2H, J=7.6, Ph-H) 6.76(t, 1H, J=7.6, 14.8, Ph-H) 6.42(d, 1H, J=8.4, Ph-H) 4.92(d, 1H, J=4.8, CH) 4.67(s, 1H, CH) 4.19(q, 2H, J=6.8, 13.6, CH<sub>2</sub>) 4.02(dd, 1H, J=3.2, 14.0, CH) 3.20(dd, 1H, J=3.2, 16.8, CH<sub>2</sub>) 2.44-2.35(m, 2H, CH<sub>2</sub>&CH<sub>2</sub>) 2.28(s, 3H, CH<sub>3</sub>) 2.12(d, 1H, J=12.4, CH<sub>2</sub>) 1.30(t, 3H, J=7.2, 14.4 CH<sub>3</sub>). <sup>13</sup>C NMR (100 M, CDCl<sub>3</sub>): δ170.6, 152.0, 143.0, 134.2, 129.8, 128.9, 128.1, 127.8, 123.7, 119.8, 115.7, 79.4, 63.8, 60.9, 58.2, 38.6, 29.7, 21.4, 14.2. HRMS(ESI/[M+Na]<sup>+</sup>) Calcd. for: C<sub>21</sub>H<sub>23</sub>NO<sub>5</sub>SNa 424.1189, found 424.1194.

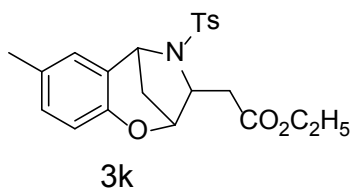

**3k** ethyl 2-(7-methyl-4-tosyl-2,3,4,5-tetrahydro-2,5-methanobenzo[f][1,4]oxazepin-3-yl)acetate

Mp 102-104 °C

<sup>1</sup>H NMR (400 M, CDCl<sub>3</sub>): δ7.26 (d, 2H, J=8.0, Ph-H) 6.95(d, 2H, J=8.4, Ph-H) 6.85(d, 1H, J=1.6, Ph-H) 6.78(dd, 1H, J=2.0, 6.8, Ph-H) 6.31(d, 1H, J=8.4, Ph-H) 4.84(d, 1H, J=4.8, CH) 4.65(s, 1H, CH) 4.20(td, 2H, J=2.0, 7.2, CH<sub>2</sub>) 4.07(dd, 1H, J=3.2, 10.8, CH) 3.22(dd, 1H, J=3.6, 16.4, CH<sub>2</sub>) 2.41(dd, 1H, J=11.2, 16.8, CH<sub>2</sub>) 2.34(ddd, 1H, J=2.8, 5.2, 12.4, CH<sub>2</sub>) 2.28(s, 3H, CH<sub>3</sub>) 2.23(s, 3H, CH<sub>3</sub>) 2.10(d, 1H, J=12.4, CH<sub>2</sub>) 1.30(t, 3H, J=7.2, 14.4 CH<sub>3</sub>). <sup>13</sup>C NMR (100 M, CDCl<sub>3</sub>): δ170.6, 149.6, 142.9, 134.5, 130.0, 128.9, 128.7, 128.6, 127.8, 123.0, 115.4, 79.4, 64.0, 60.9, 58.2, 38.8, 29.8, 21.4, 20.2, 14.2. HRMS(ESI/[M+H]<sup>+</sup>) Calcd. for: C<sub>22</sub>H<sub>26</sub>NO<sub>5</sub>S 416.1526, found 416.1531.

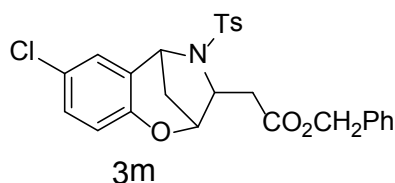

**3m** benzyl 2-(7-chloro-4-tosyl-2,3,4,5-tetrahydro-2,5-methanobenzo[f][1,4]oxazepin-3-yl)acetate

Mp 222-224 °C

<sup>1</sup>H NMR (400 M, CDCl<sub>3</sub>): δ7.40-7.35(m, 5H, Ph-H) 7.32 (d, 2H, J=8.0, Ph-H) 7.00(d, 2H, J=8.0, Ph-H) 6.97(d, 1H, J=2.8, Ph-H) 6.90(dd, 1H, J=2.4, 8.8, Ph-H) 6.34(d, 1H, J=8.4, Ph-H) 5.18(s, 2H, CH<sub>2</sub>) 4.81(d, 1H, J=4.8, CH) 4.68(s, 1H, CH) 4.16(dd, 1H, J=3.2, 10.8, CH) 3.25(dd, 1H, J=3.6, 16.8, CH<sub>2</sub>) 2.48(dd, 1H, J=10.8, 16.4, CH<sub>2</sub>) 2.34(ddd, 1H, J=2.8, 5.2, 12.8, CH<sub>2</sub>) 2.29(s, 3H, CH<sub>3</sub>) 2.08(d, 1H, J=12.4, CH<sub>2</sub>). <sup>13</sup>C NMR (100 M, CDCl<sub>3</sub>): δ170.4, 150.4, 143.3, 134.3, 129.3, 128.9, 128.7, 128.5, 128.4, 127.9, 127.7, 124.6, 124.4, 117.0, 79.6, 66.8, 64.0, 57.0, 38.7, 29.4, 21.4. HRMS(ESI/[M+H]<sup>+</sup>) Calcd. for: C<sub>26</sub>H<sub>25</sub>ClNO<sub>5</sub>S 498.1136, found 498.1125.

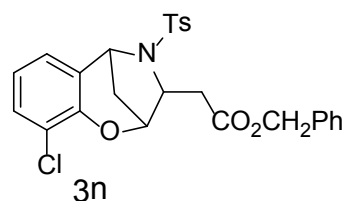

**3n** benzyl 2-(9-chloro-4-tosyl-2,3,4,5-tetrahydro-2,5-methanobenzo[f][1,4]oxazepin-3-yl)acetate

Mp 192-194 °C

<sup>1</sup>H NMR (400 M, CDCl<sub>3</sub>): δ7.40-7.35(m, 5H, Ph-H) 7.21 (d, 2H, J=8.4, Ph-H) 7.09(dd,



1H, J=1.6, 8.0, Ph-H) 7.03(dd, 1H, J=1.6, 7.6, Ph-H) 6.93(d, 2H, J=8.0, Ph-H) 6.72(t, 1H, J=7.6, 15.2, Ph-H) 5.19(s, 2H, CH<sub>2</sub>) 4.91(d, 1H, J=4.8, CH) 4.82(s, 1H, CH) 4.16(dd, 1H, J=3.6, 10.4, CH) 3.20(dd, 1H, J=3.6, 16.4, CH<sub>2</sub>) 2.49(dd, 1H, J=10.8, 16.4, CH<sub>2</sub>) 2.39(ddd, 1H, J=2.8, 5.2, 12.8, CH<sub>2</sub>) 2.29(s, 3H, CH<sub>3</sub>) 2.10(d, 1H, J=12.4, CH<sub>2</sub>). <sup>13</sup>C NMR (100 M, CDCl<sub>3</sub>): δ170.1, 147.9, 143.4, 135.5, 133.9, 130.3, 128.9, 128.7, 128.4, 128.3, 127.5, 126.4, 125.2, 120.6, 120.4, 80.1, 66.9, 64.0, 57.8, 38.7, 29.6, 21.4. HRMS(ESI/[M+H]<sup>+</sup>) Calcd. for: C<sub>26</sub>H<sub>25</sub>ClNO<sub>5</sub>S 498.1136, found 498.1124.

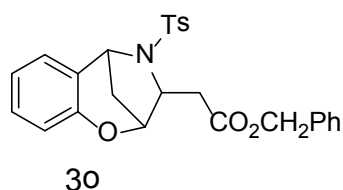

**30** benzyl 2-(4-tosyl-2,3,4,5-tetrahydro-2,5-methanobenzo[f][1,4]oxazepin-3-yl)acetate

Mp 169-171 °C

<sup>1</sup>H NMR (400 M, CDCl<sub>3</sub>): δ7.40-7.35(m, 5H, Ph-H) 7.20 (d, 2H, J=8.4, Ph-H) 7.13(dd, 1H, J=1.6, 7.2, Ph-H) 7.03(td, 1H, J=1.6, 8.0, Ph-H) 6.90(d, 2H, J=8.0, Ph-H) 6.77(td, 1H, J=0.8, 7.6, Ph-H) 6.42(d, 1H, J=8.0, Ph-H) 5.18(d, 1H, J=2.4, CH<sub>2</sub>) 4.91(d, 1H, J=4.8, CH) 4.66(s, 1H, CH) 4.04(dd, 1H, J=3.6, 10.8, CH) 3.25(dd, 1H, J=3.6, 16.8, CH<sub>2</sub>) 2.48(dd, 1H, J=10.8, 16.8, CH<sub>2</sub>) 2.34(ddd, 1H, J=2.4, 4.8, 12.4, CH<sub>2</sub>) 2.27(s, 3H, CH<sub>3</sub>) 2.12(d, 1H, J=12.4, CH<sub>2</sub>). <sup>13</sup>C NMR (100 M, CDCl<sub>3</sub>): δ170.4, 152.0, 143.0, 135.5, 134.1, 129.8, 128.9, 128.7, 128.4, 128.1, 127.8, 123.7, 119.9, 115.7, 79.4, 66.8, 64.0, 58.2, 38.5, 29.7, 21.4. HRMS(ESI/[M+H]<sup>+</sup>) Calcd. for: C<sub>26</sub>H<sub>26</sub>NO<sub>5</sub>S 464.1526, found 464.1519.

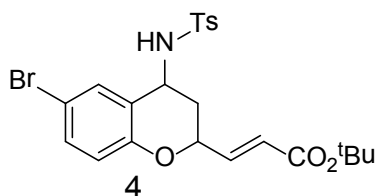

**4** (E)-tert-butyl 3-(6-bromo-4-(4-methylphenylsulfonamido)chroman-2-yl)acrylate

Mp 165-168 °C

<sup>1</sup>H NMR (400 M, CDCl<sub>3</sub>): δ7.83(d, 2H, J=8.2, Ph-H) 7.38(d, 2H, J=8.1, Ph-H) 7.23(dd, 1H, J=2.3, 8.8, Ph-H) 7.06(d, 1H, J=2.3, Ph-H) 6.87(dd, 1H, J=4.3, 15.6, CH=CH) 6.70(d, 1H, J=8.8, Ph-H) 6.05(dd, 1H, J=1.6, 15.6, CH=CH) 4.72-4.67(m, 3H,

NH&CH&CH) 2.48(s, 3H, CH<sub>3</sub>) 2.28-2.23(m, 1H, CH<sub>2</sub>) 1.83-1.72(m, 1H, CH<sub>2</sub>) 1.49(s, 9H, <sup>t</sup>Bu-H). <sup>13</sup>C NMR (100 M, CDCl<sub>3</sub>): δ165.3, 153.3, 144.1, 142.9, 132.4, 130.5, 130.2, 127.2, 126.9, 123.9, 123.8, 118.9, 113.4, 81.0, 48.5, 35.2, 28.1, 21.6. HRMS(ESI/[M+NH<sub>4</sub>]<sup>+</sup>) Calcd. for: C<sub>23</sub>H<sub>27</sub>BrN<sub>2</sub>O<sub>5</sub>S 525.1053, found 525.1029.

## 7. NMR spectra for all new compounds

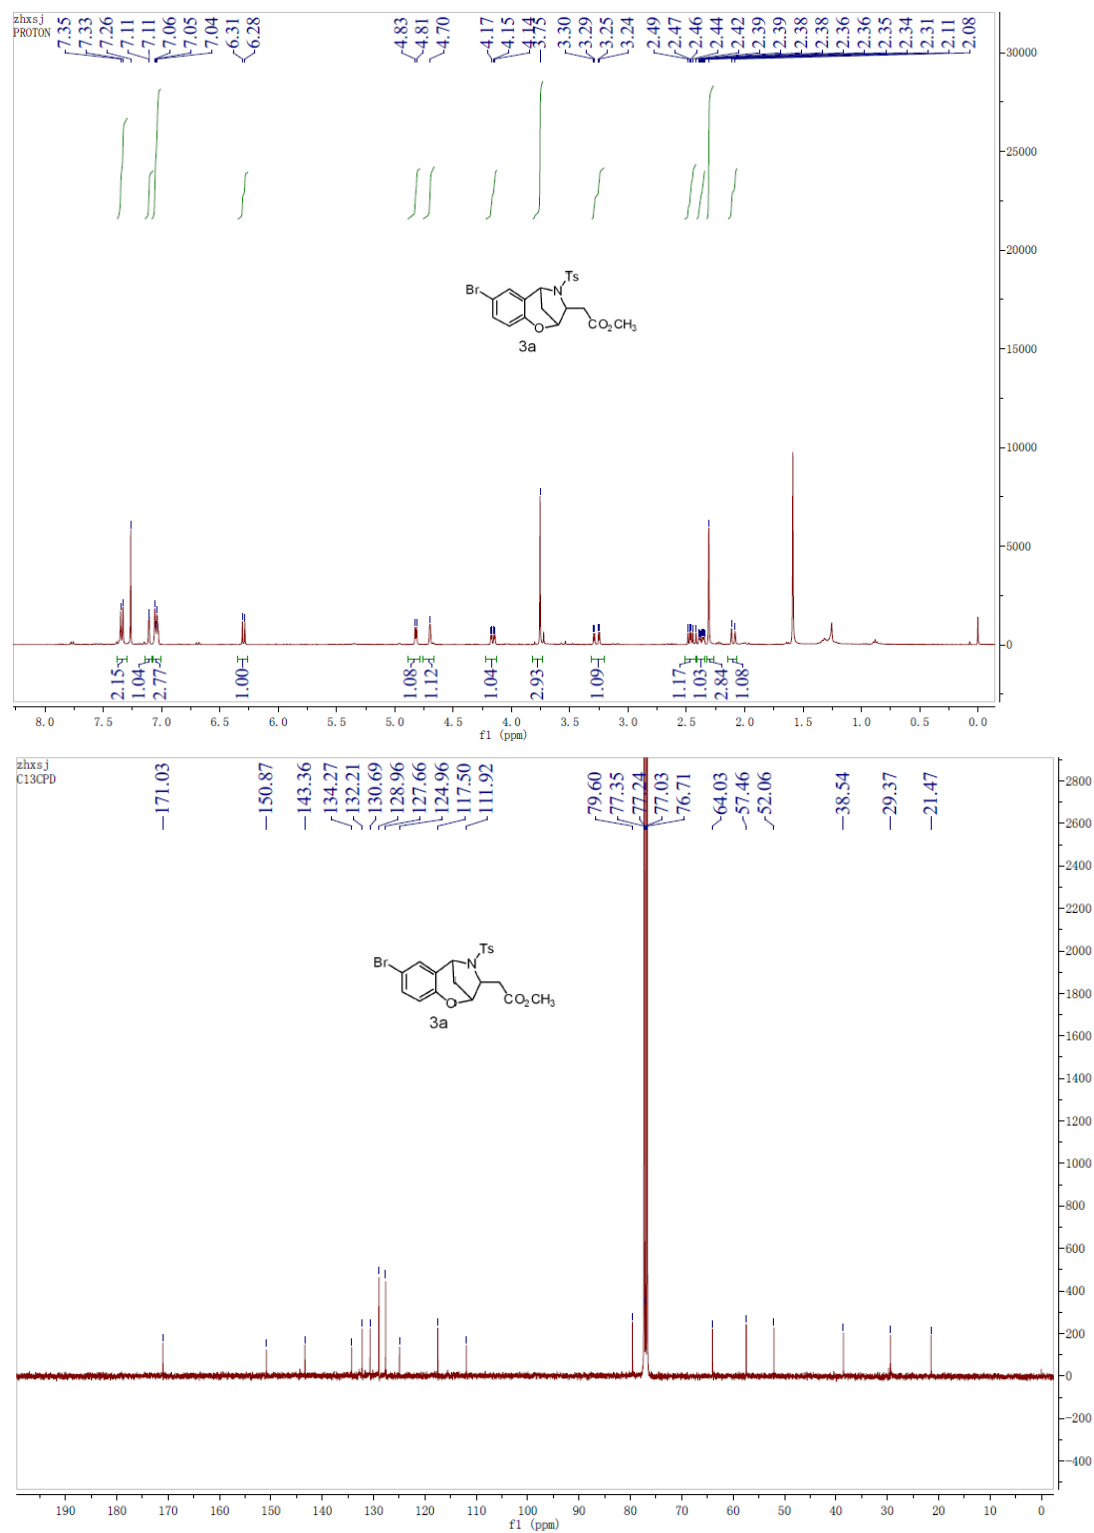

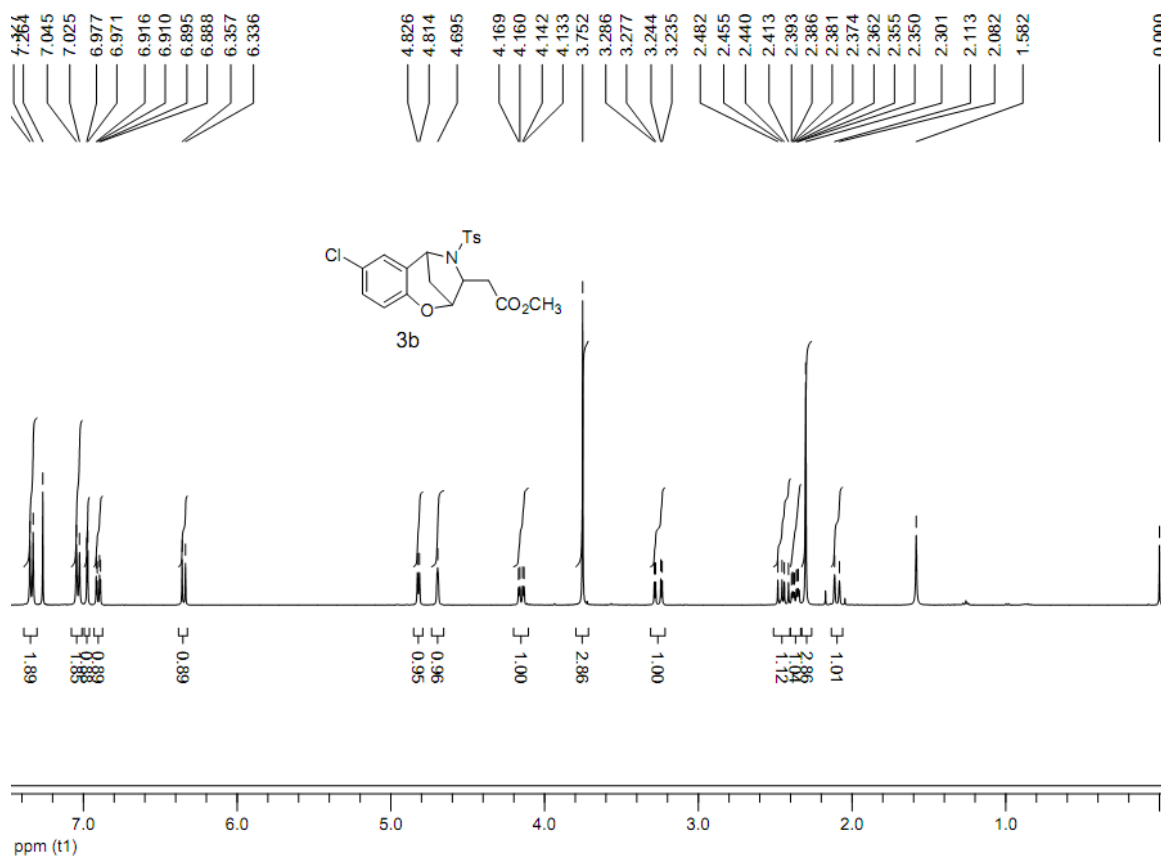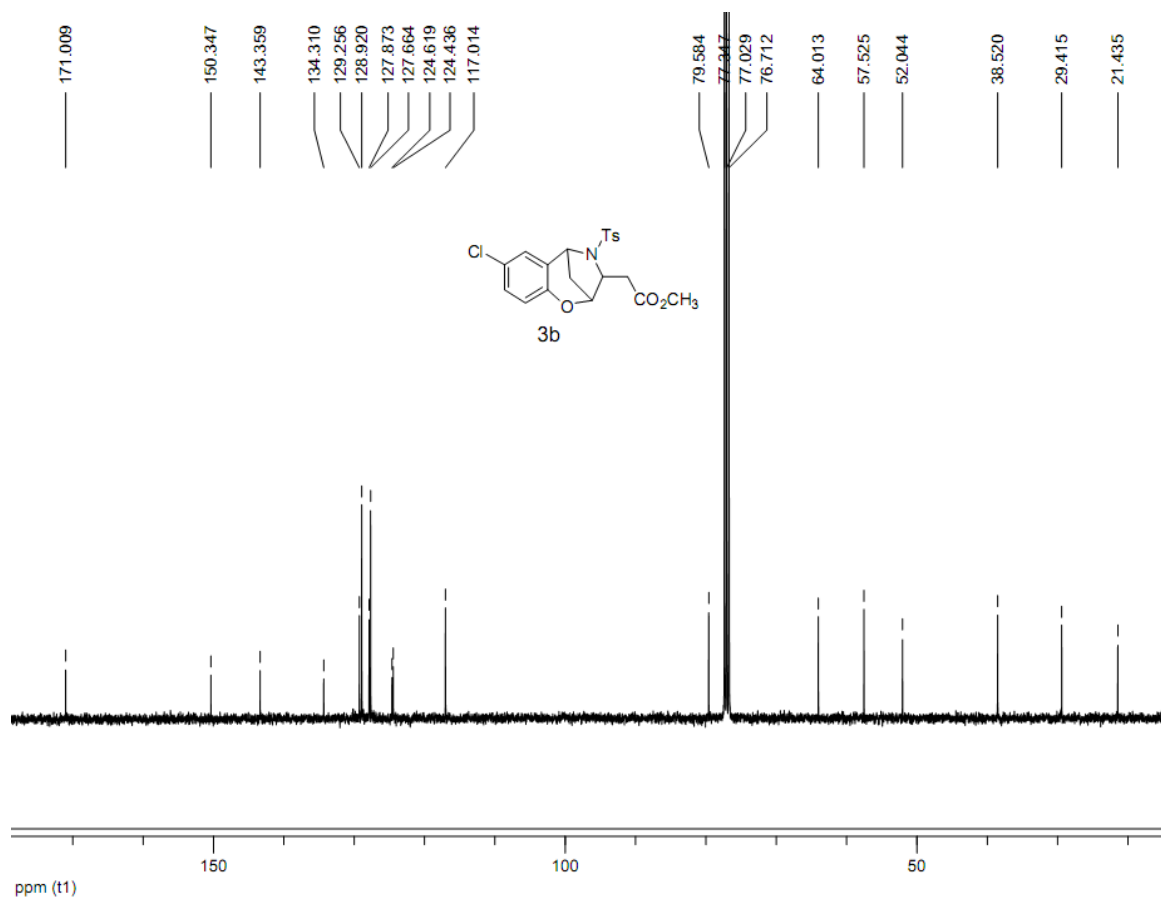

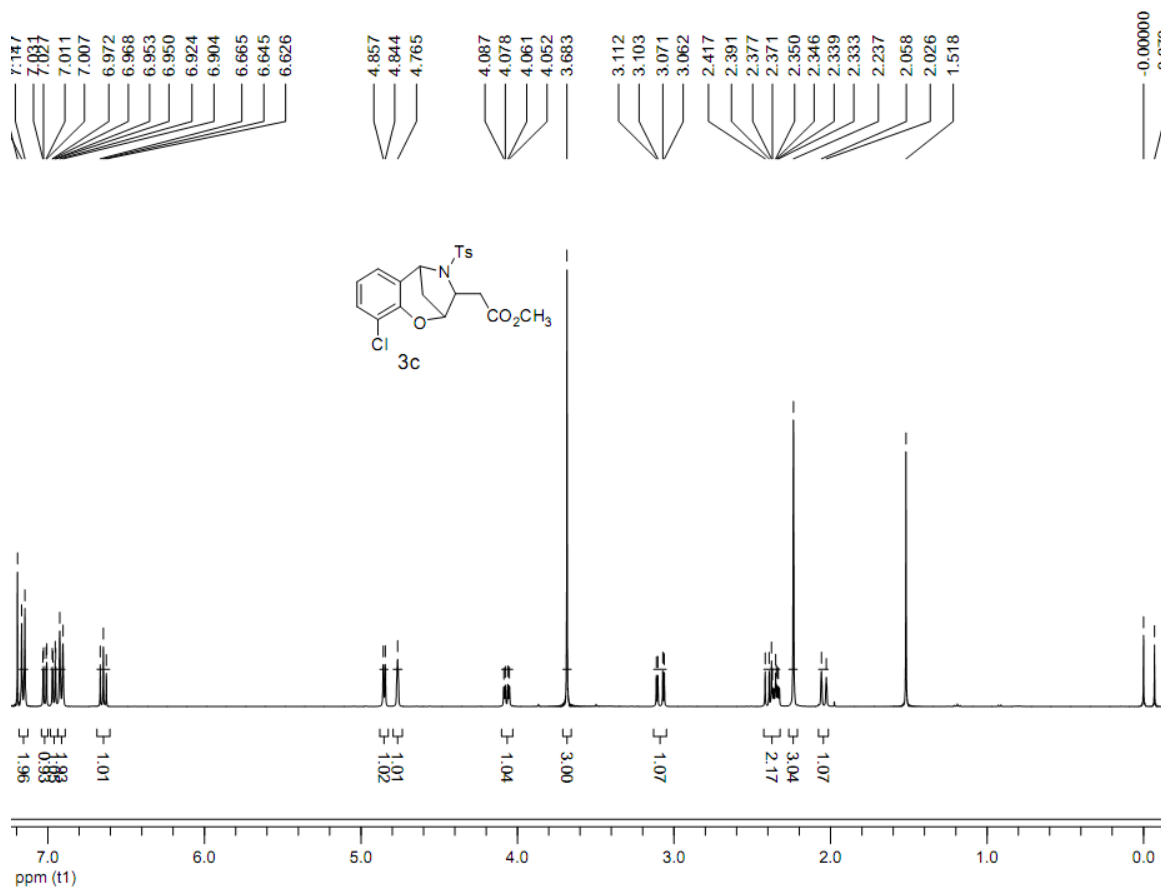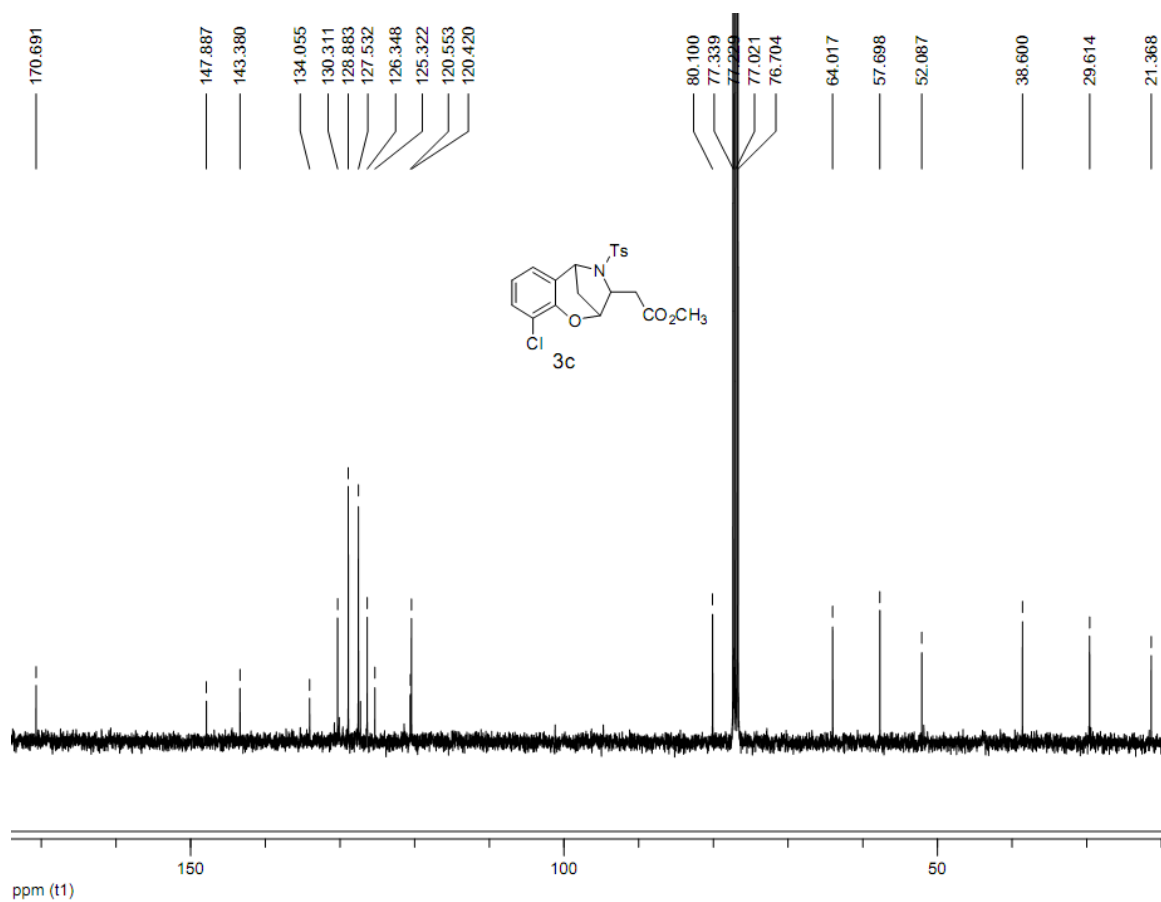

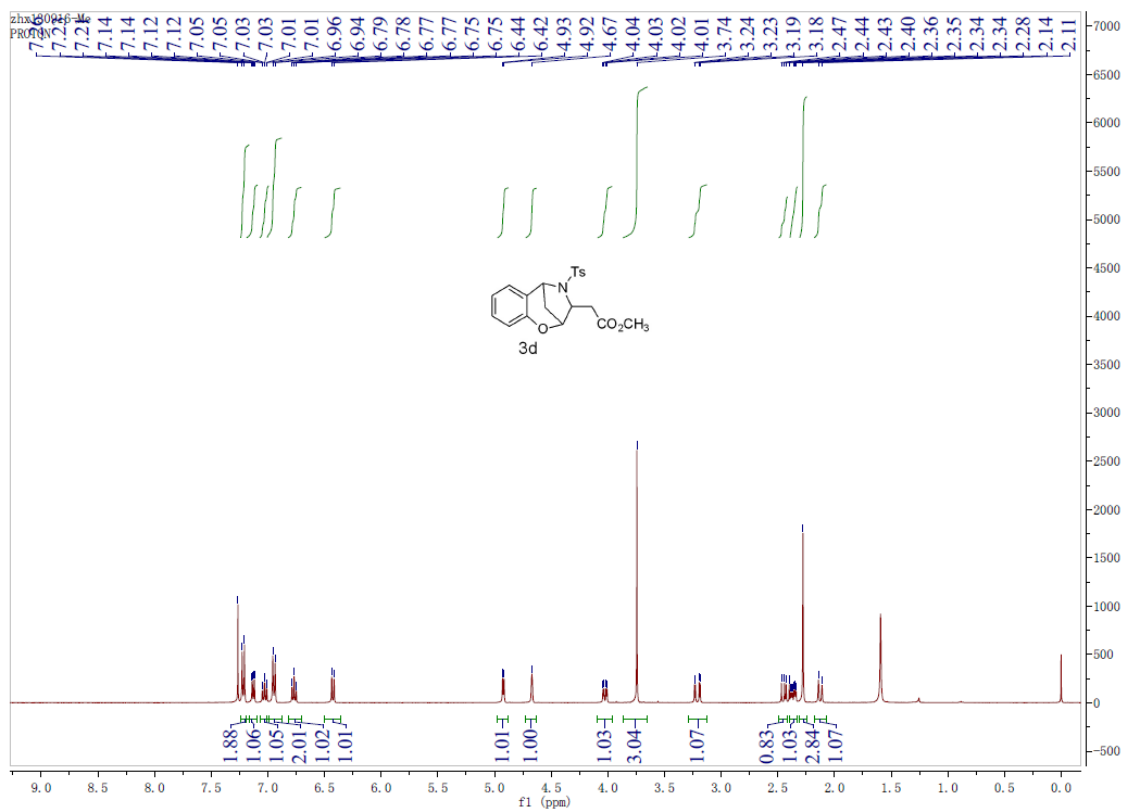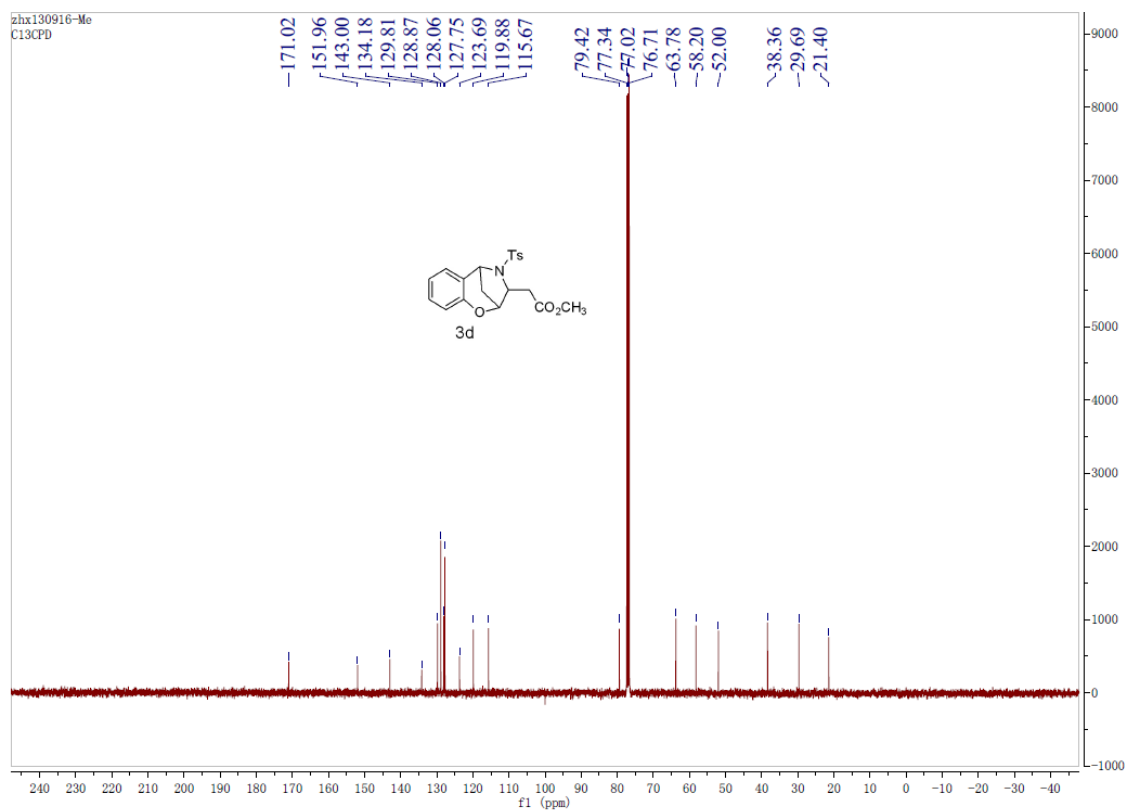

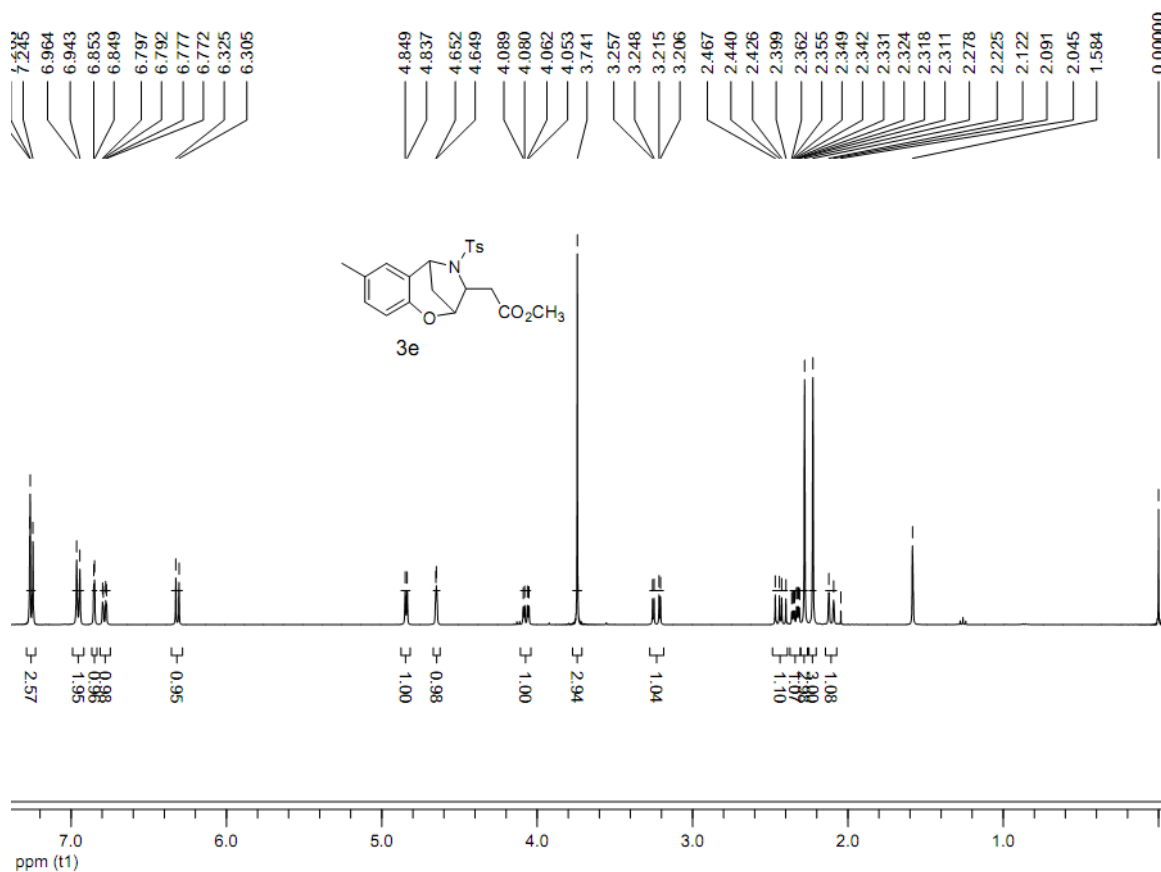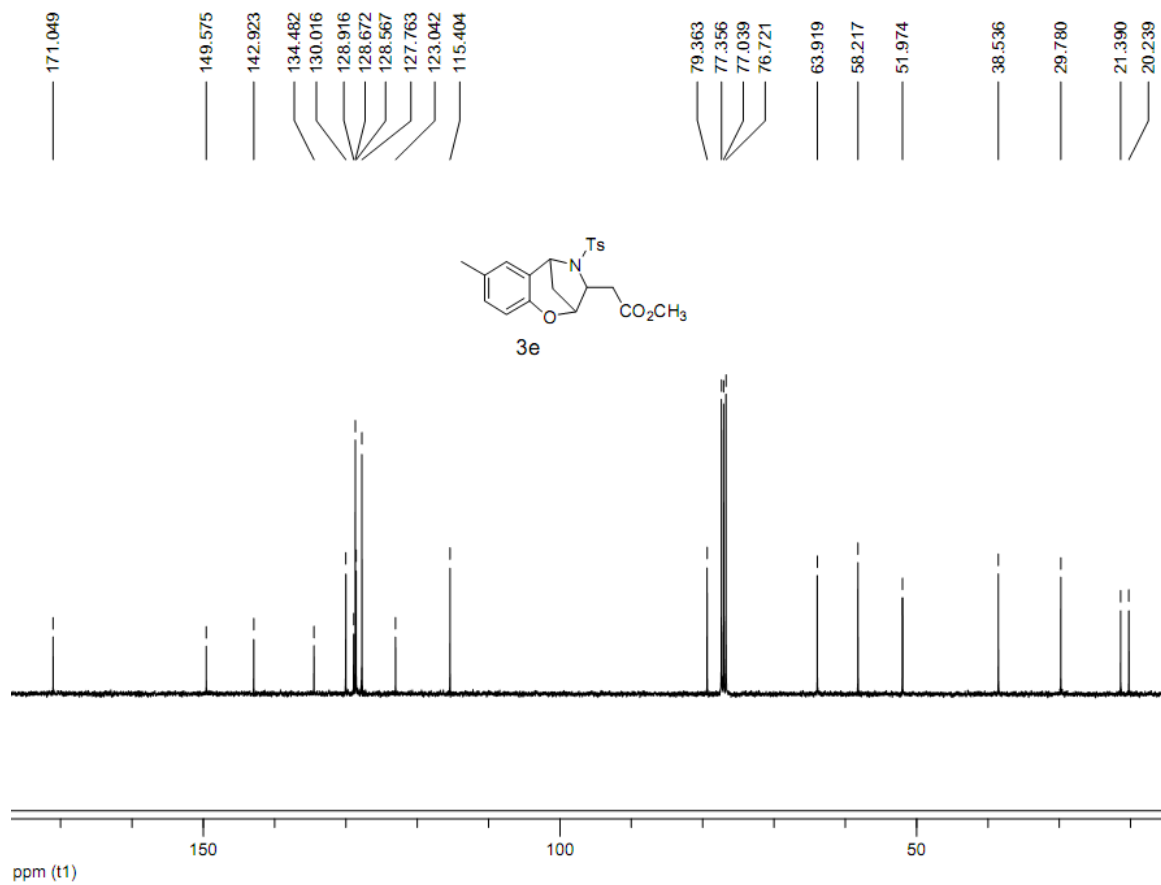

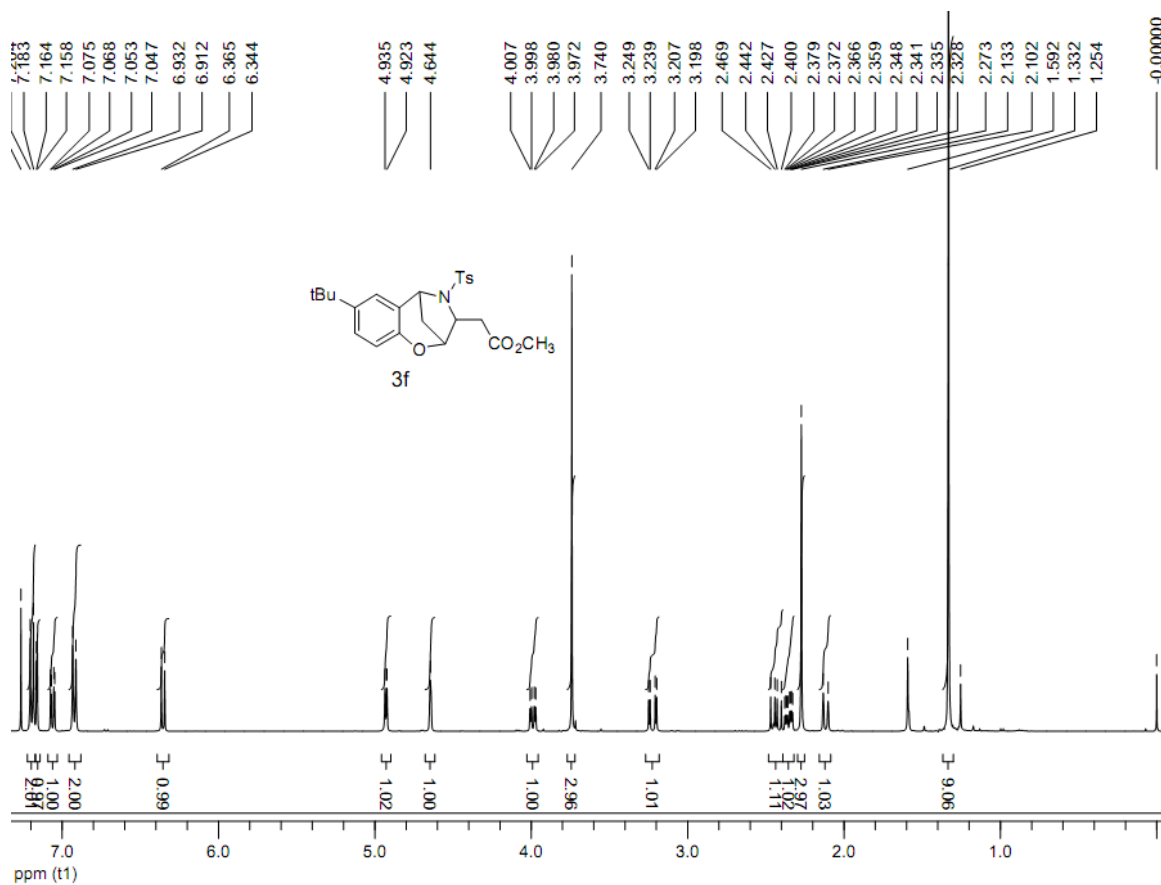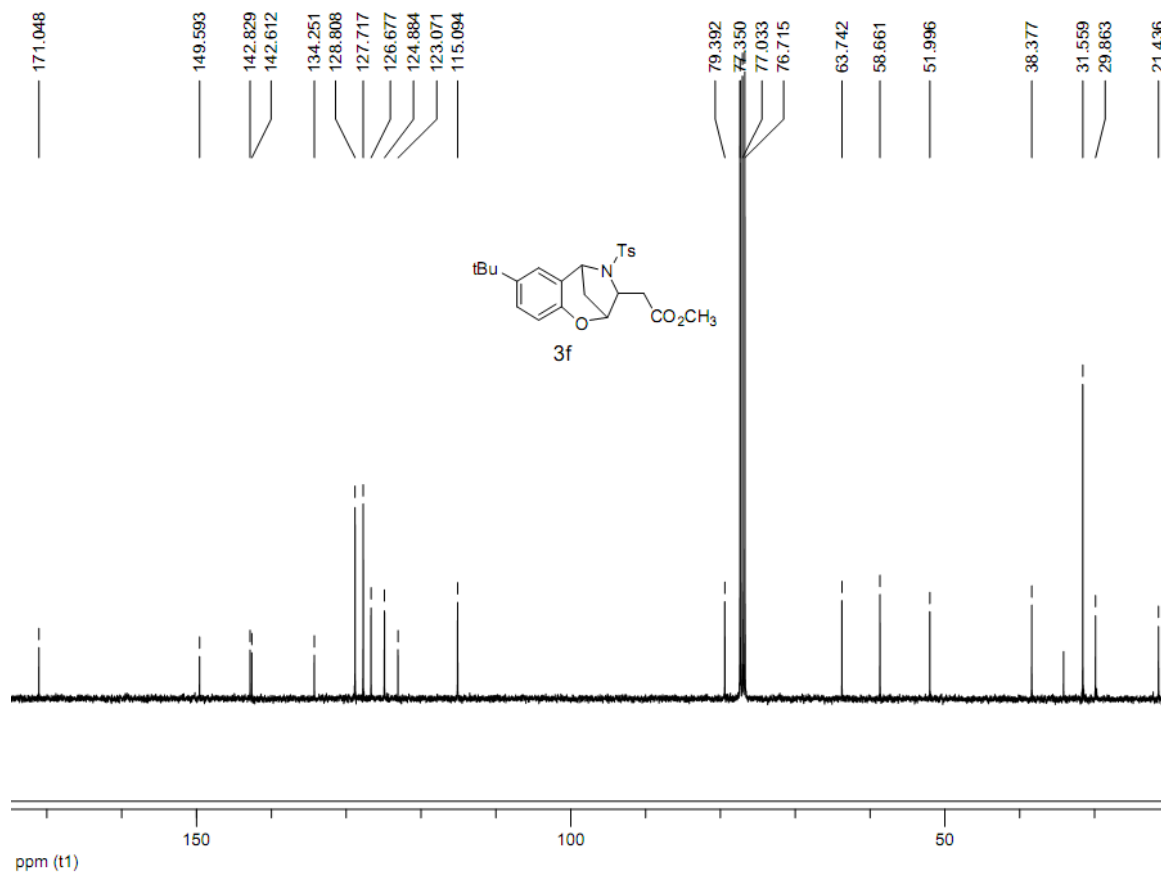



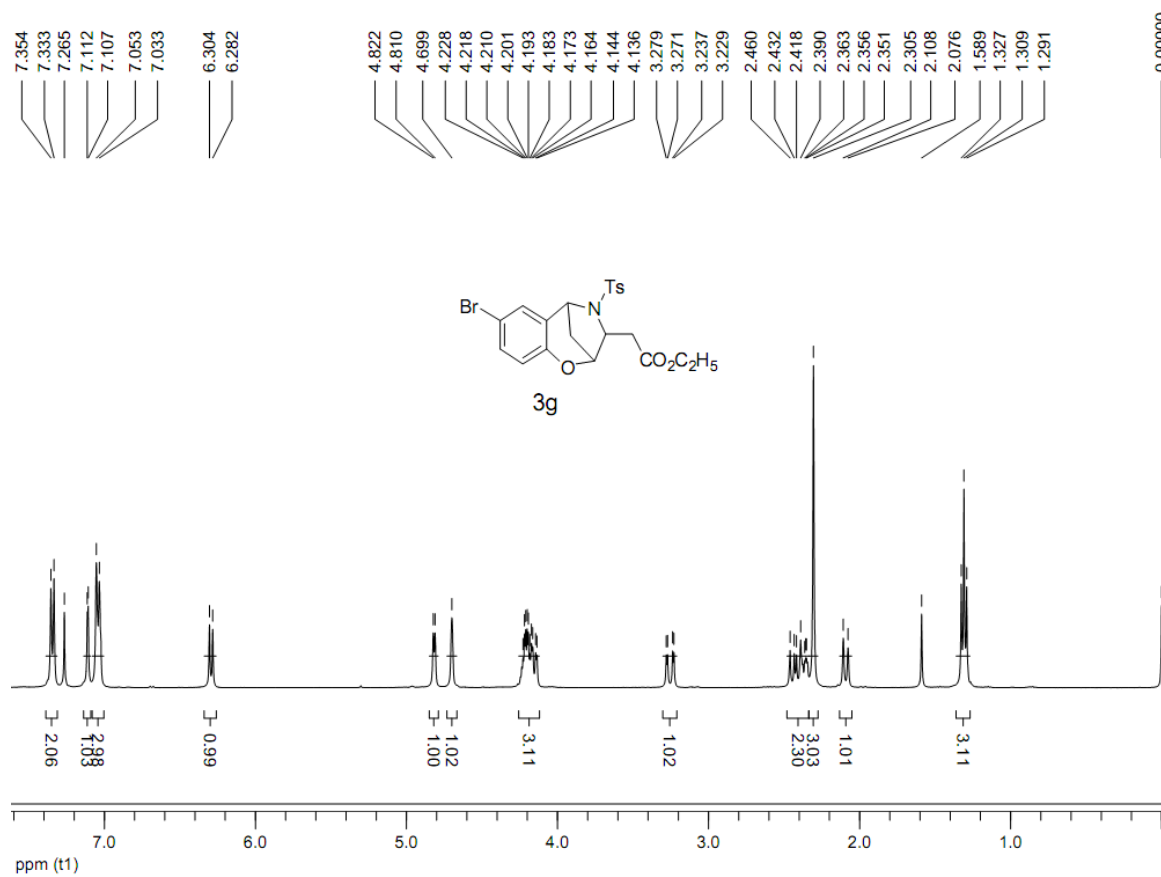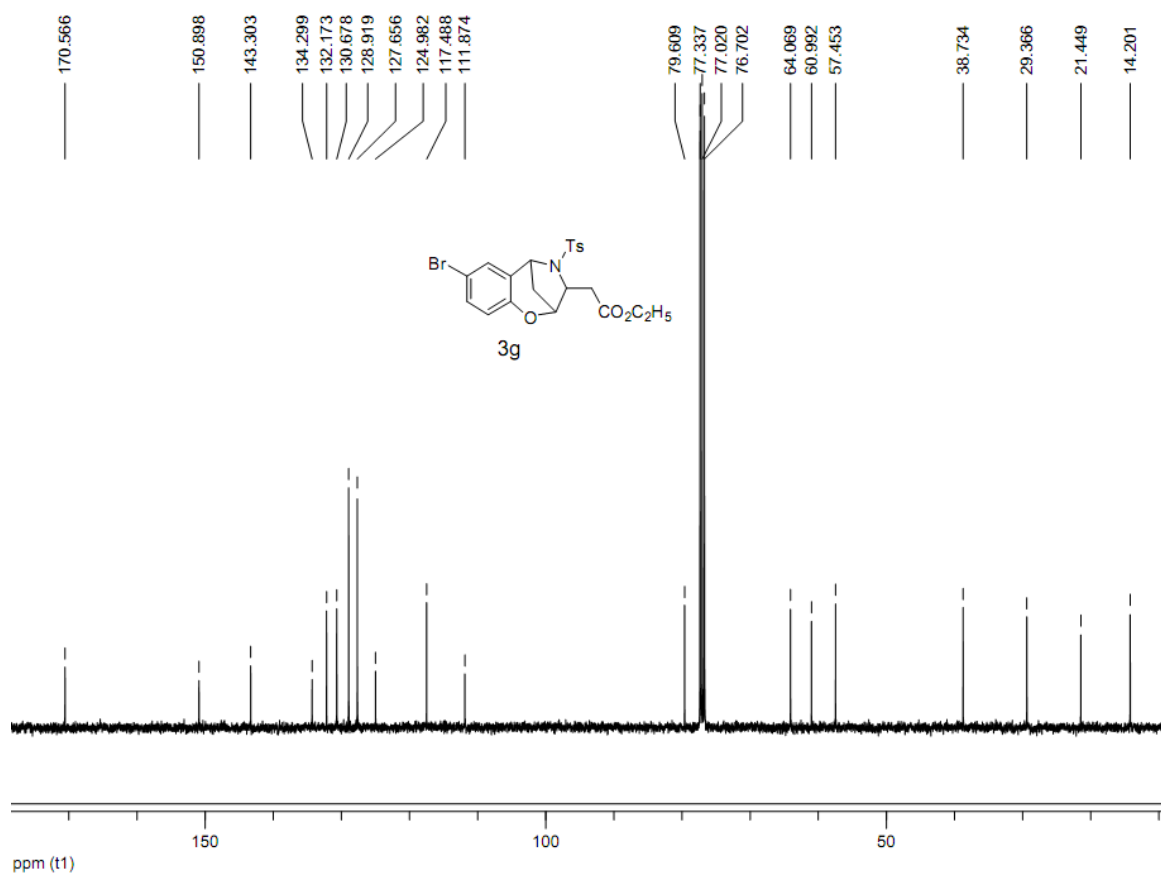

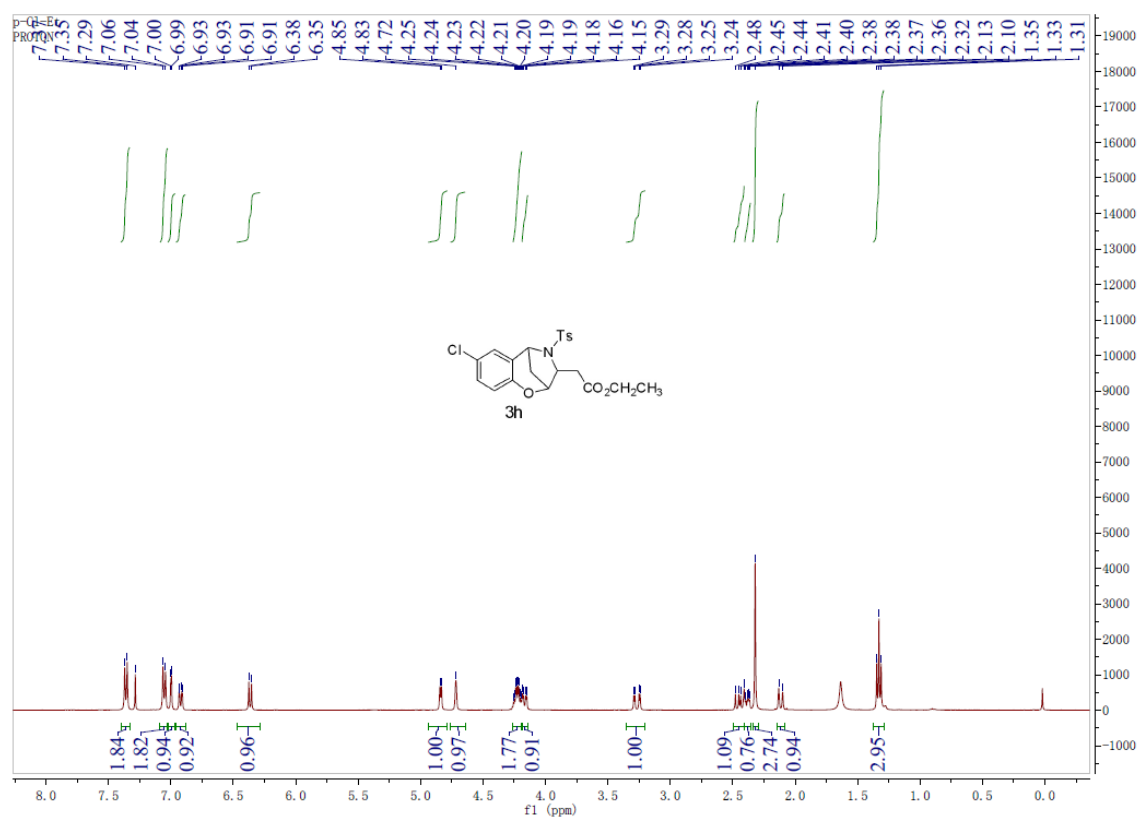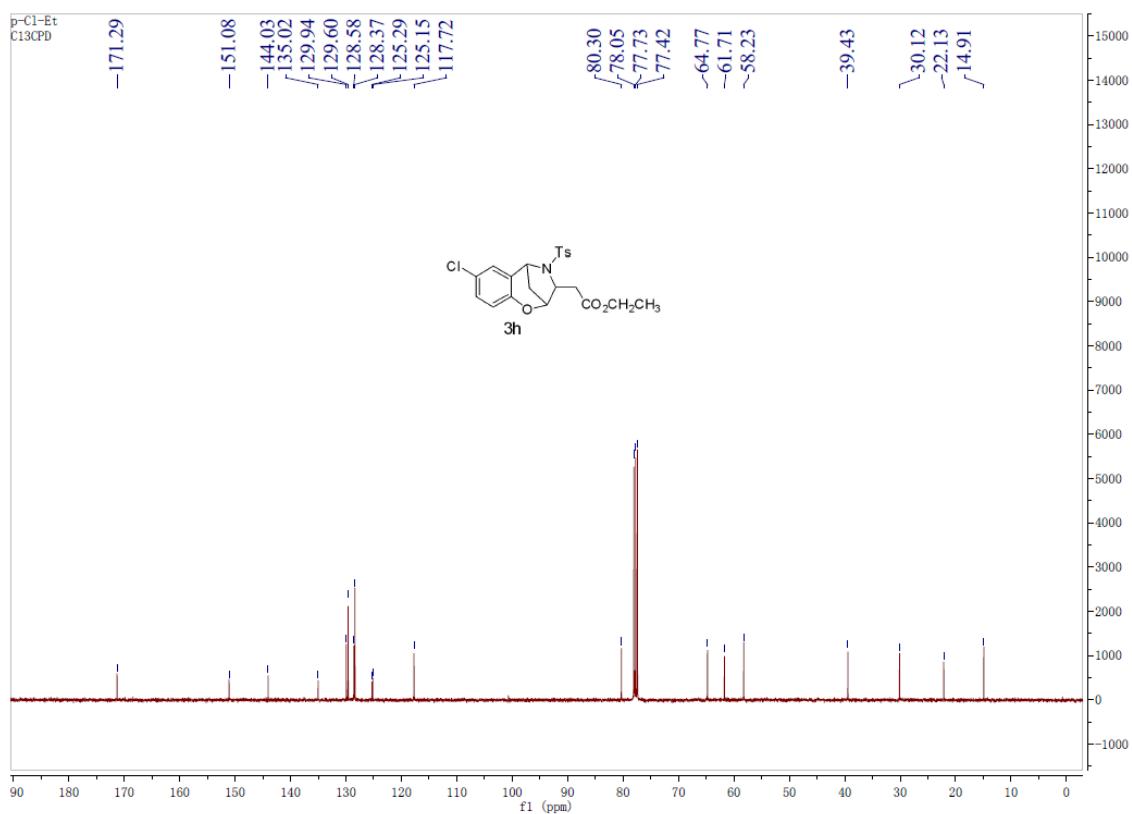

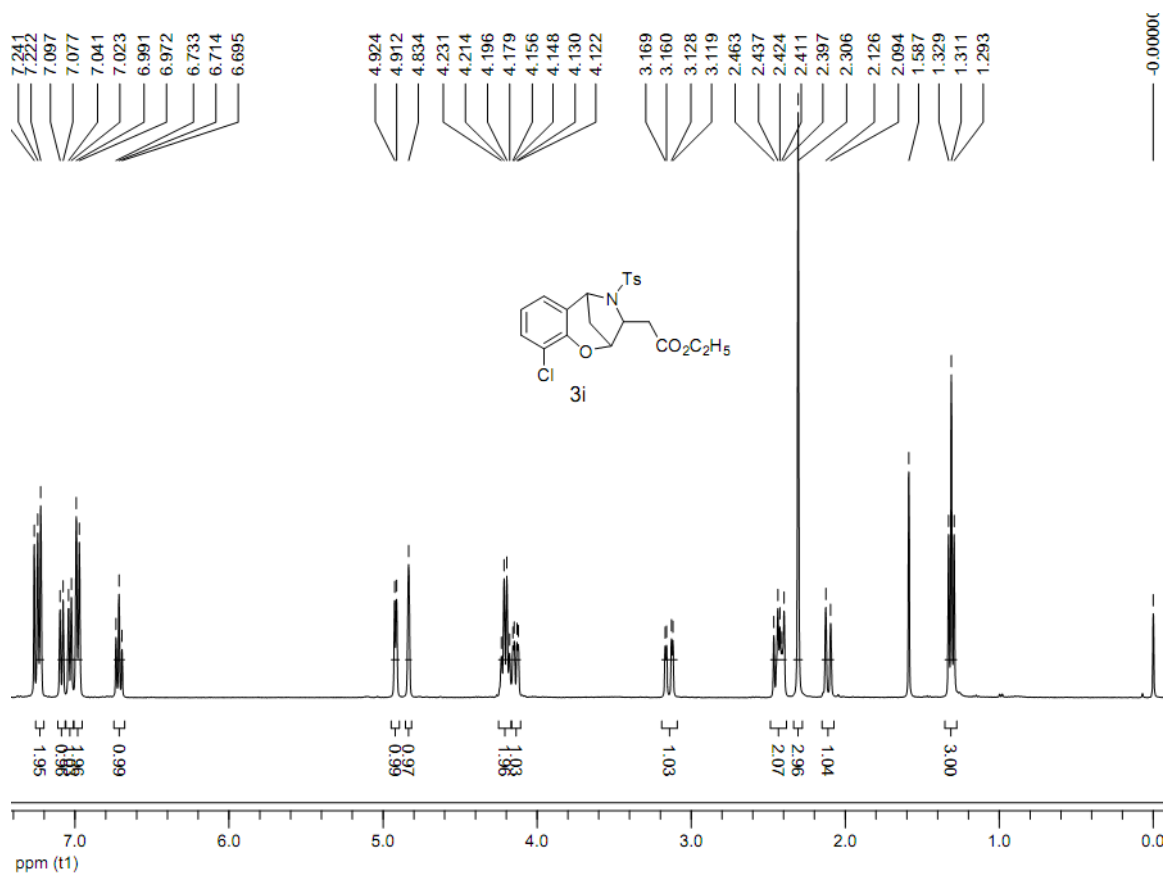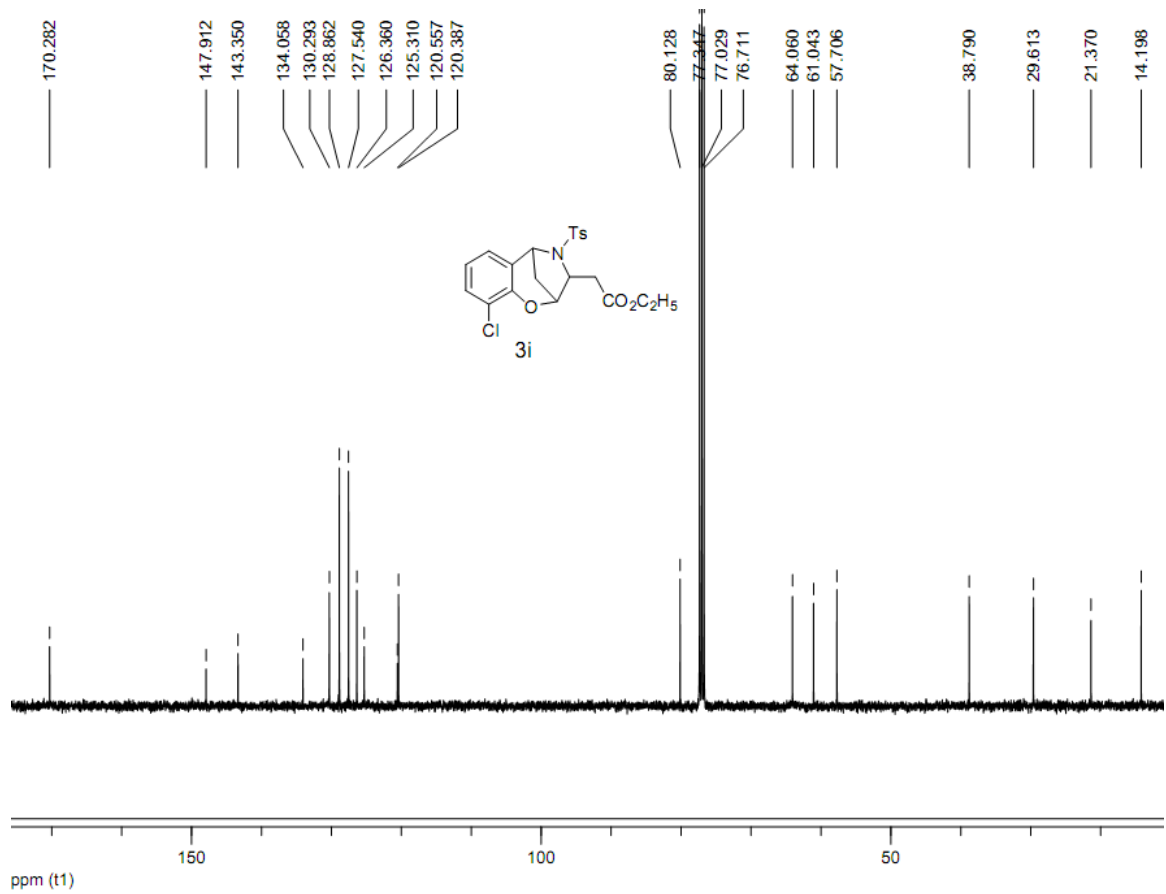

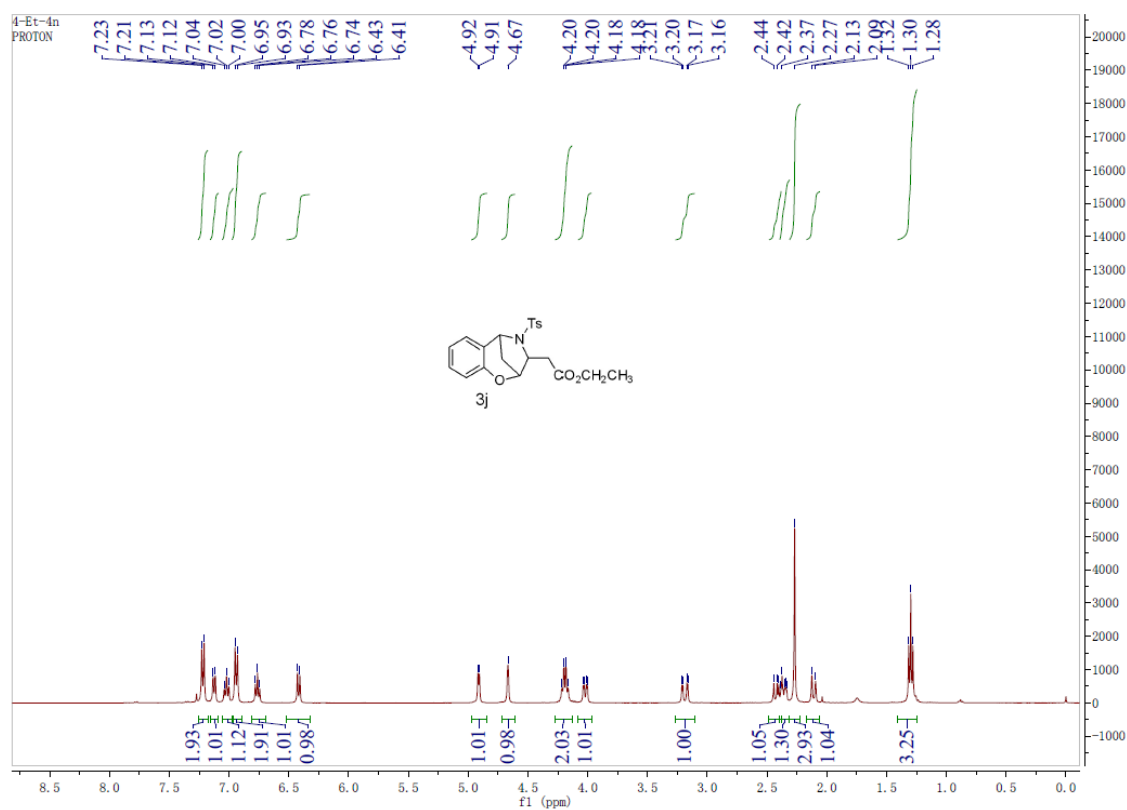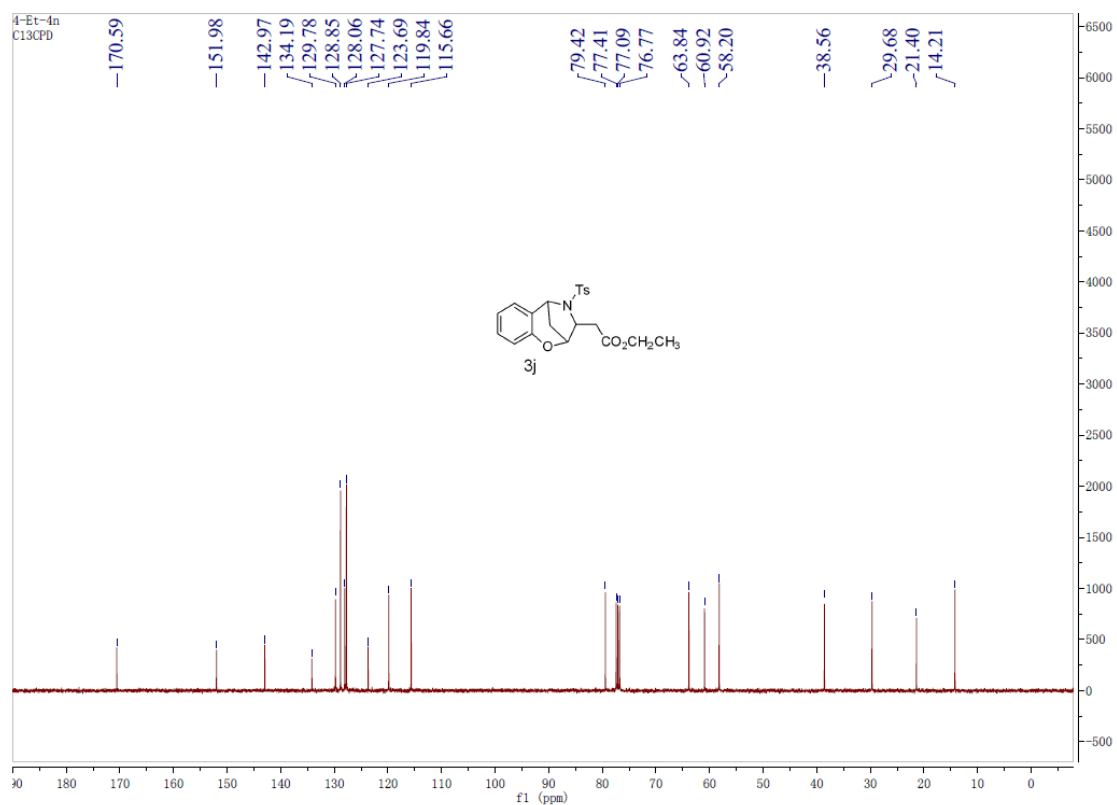

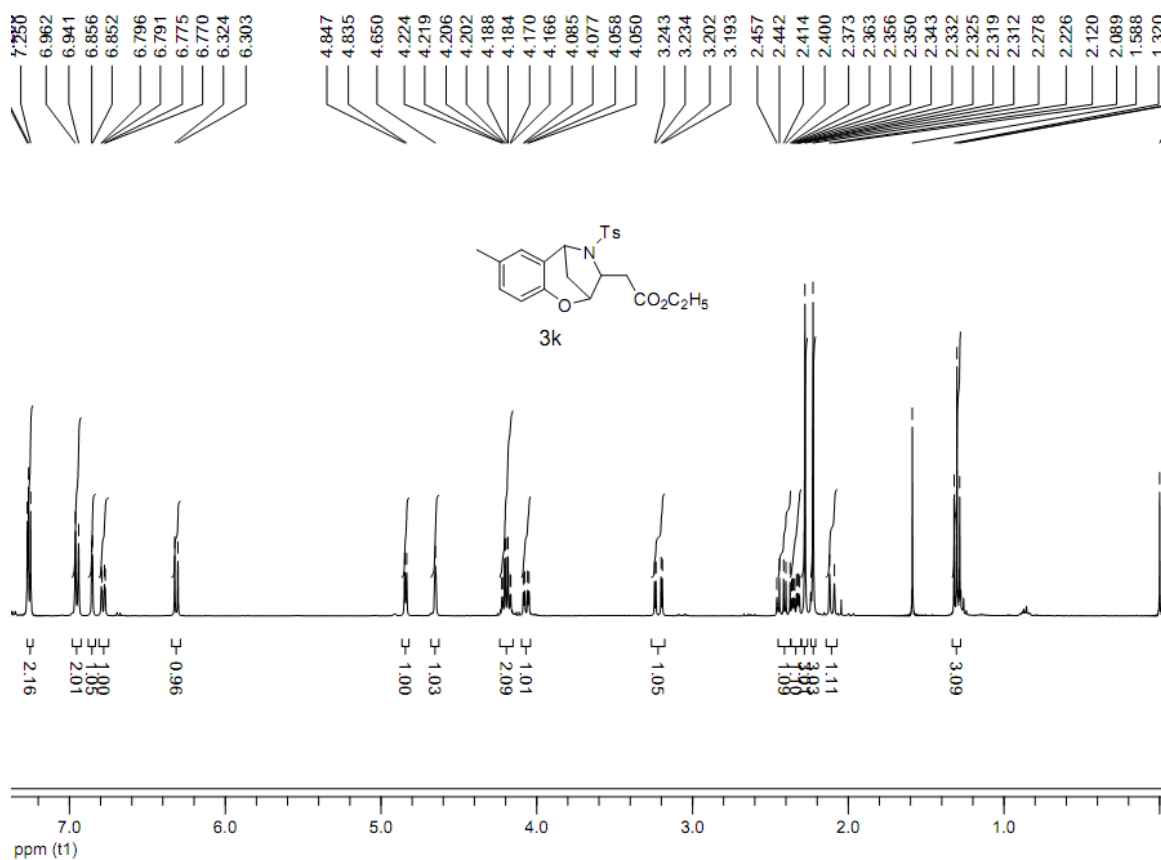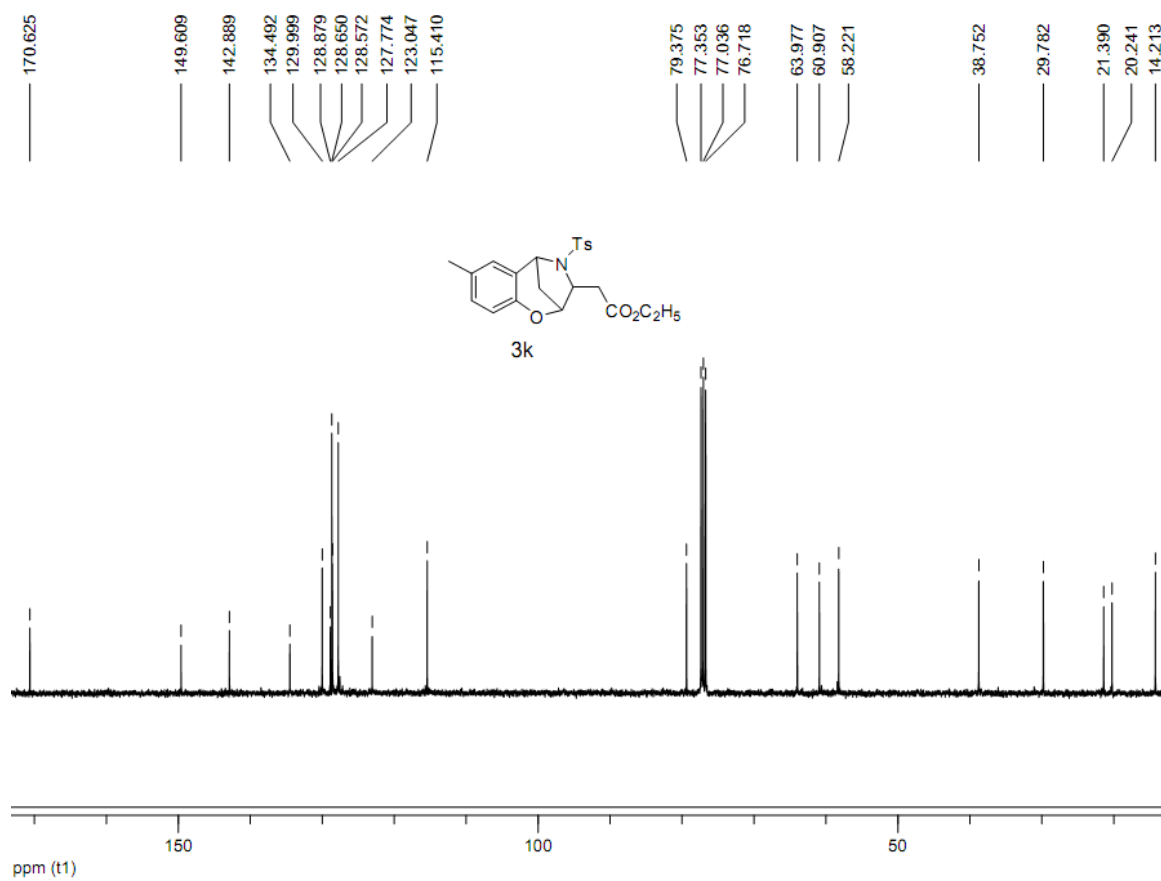

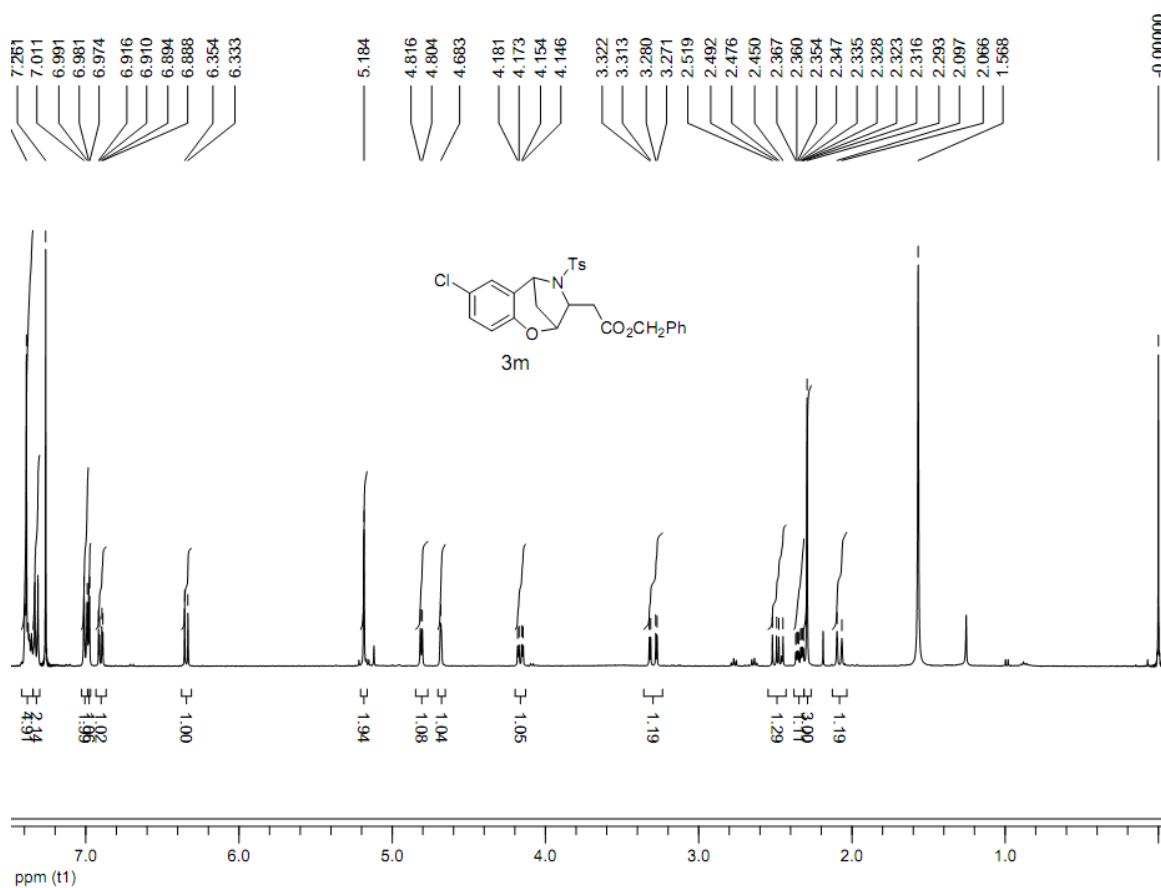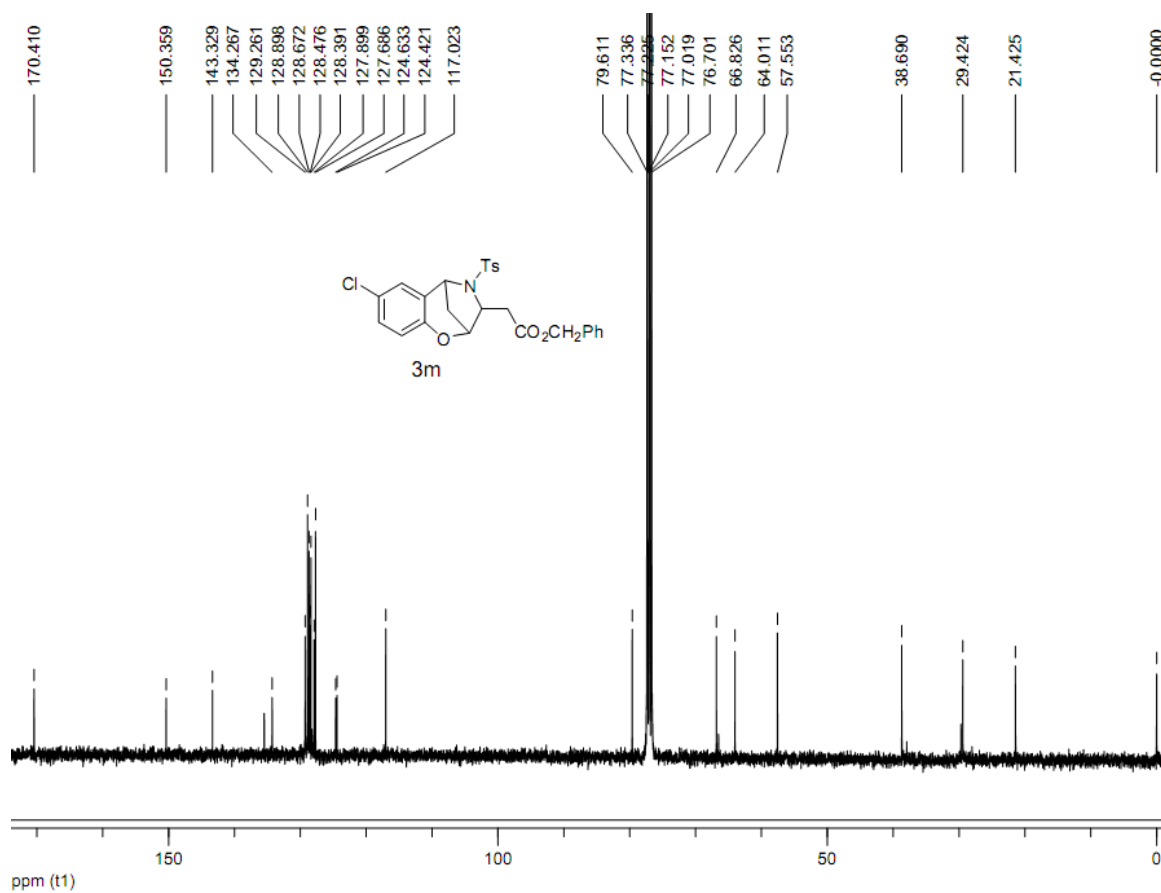

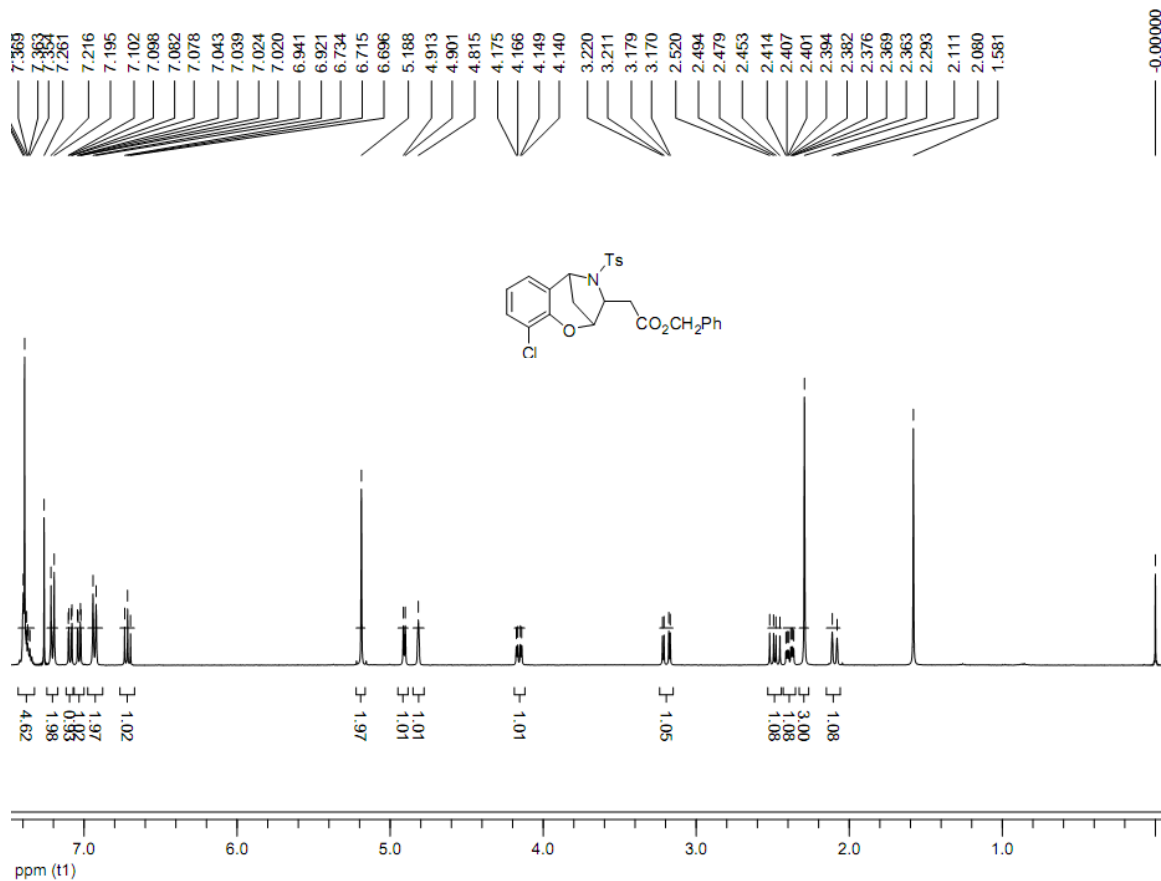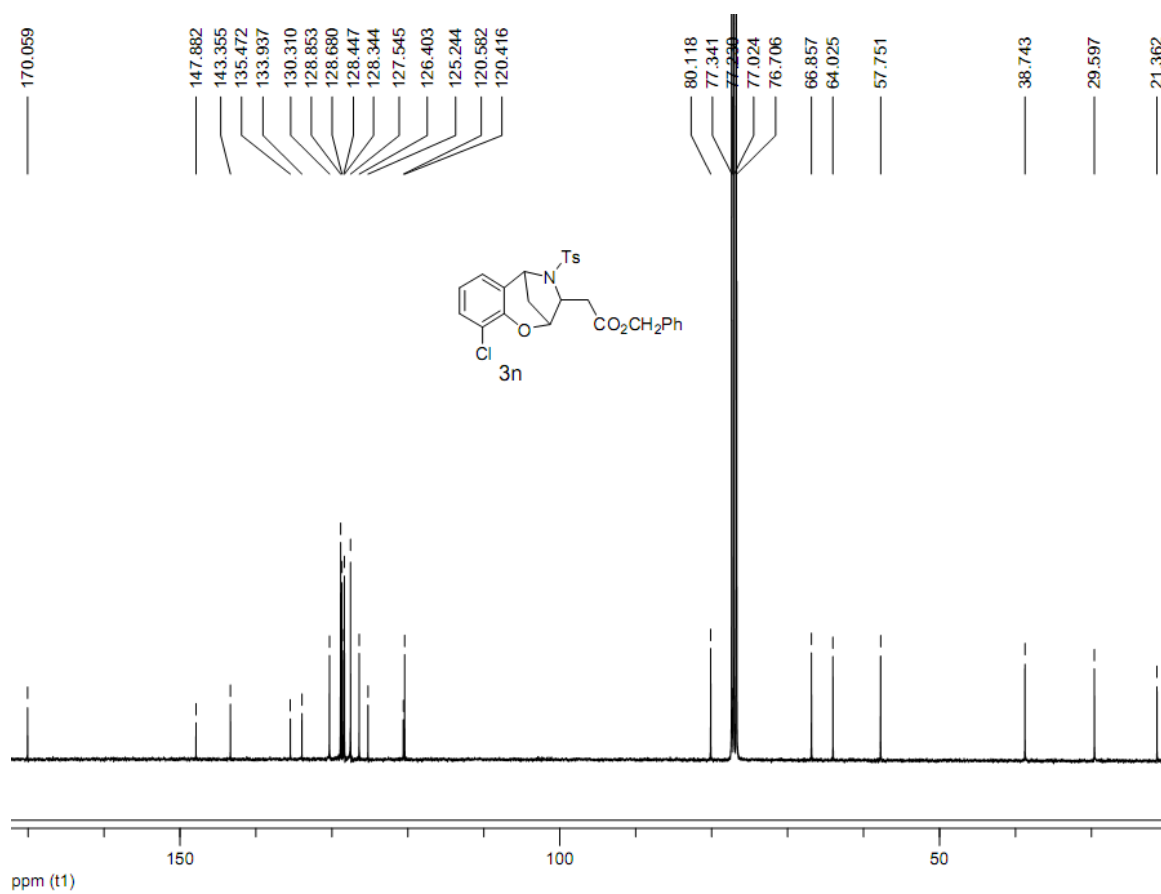

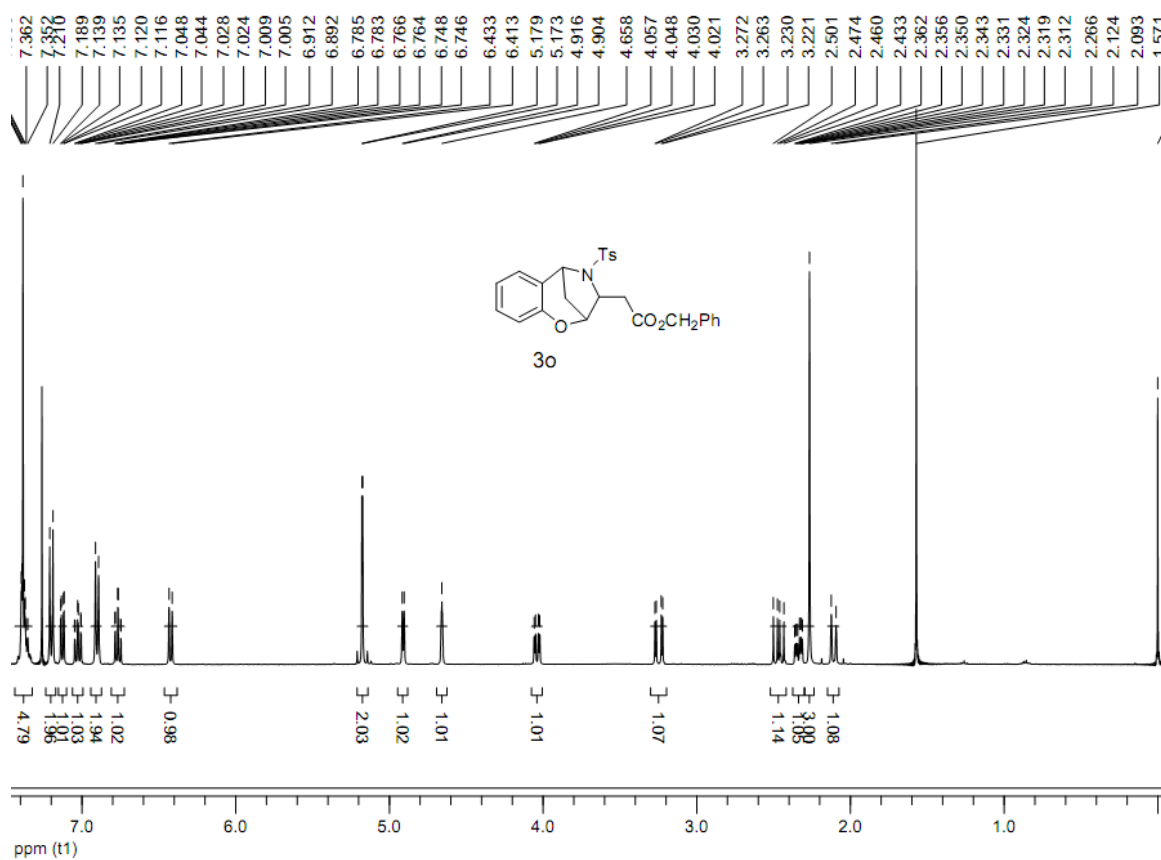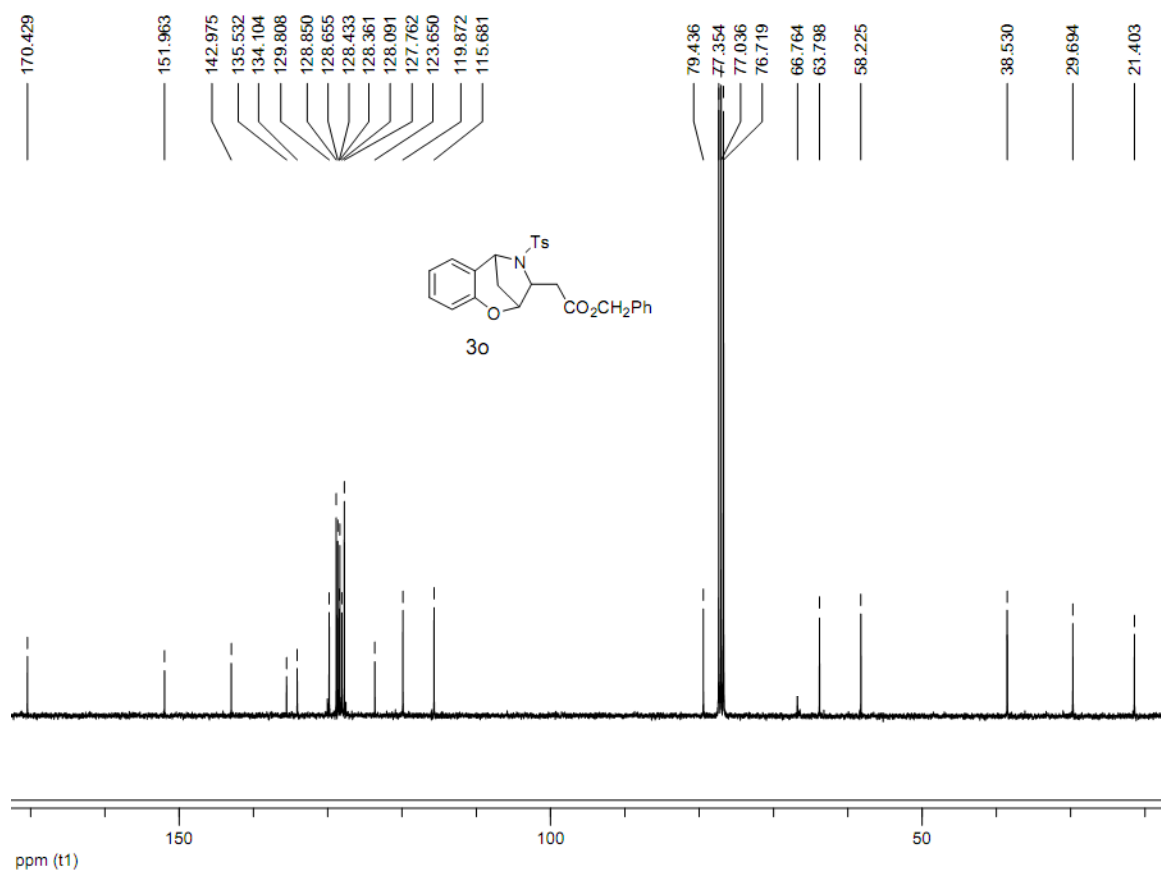



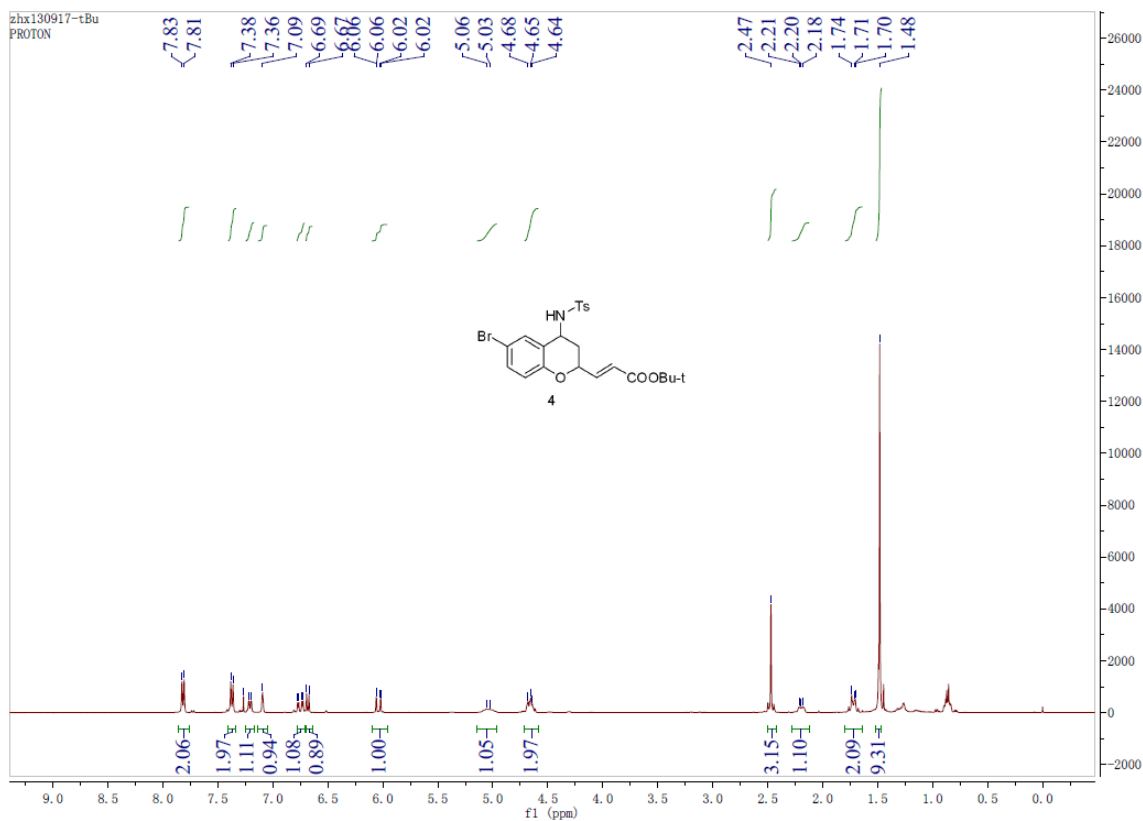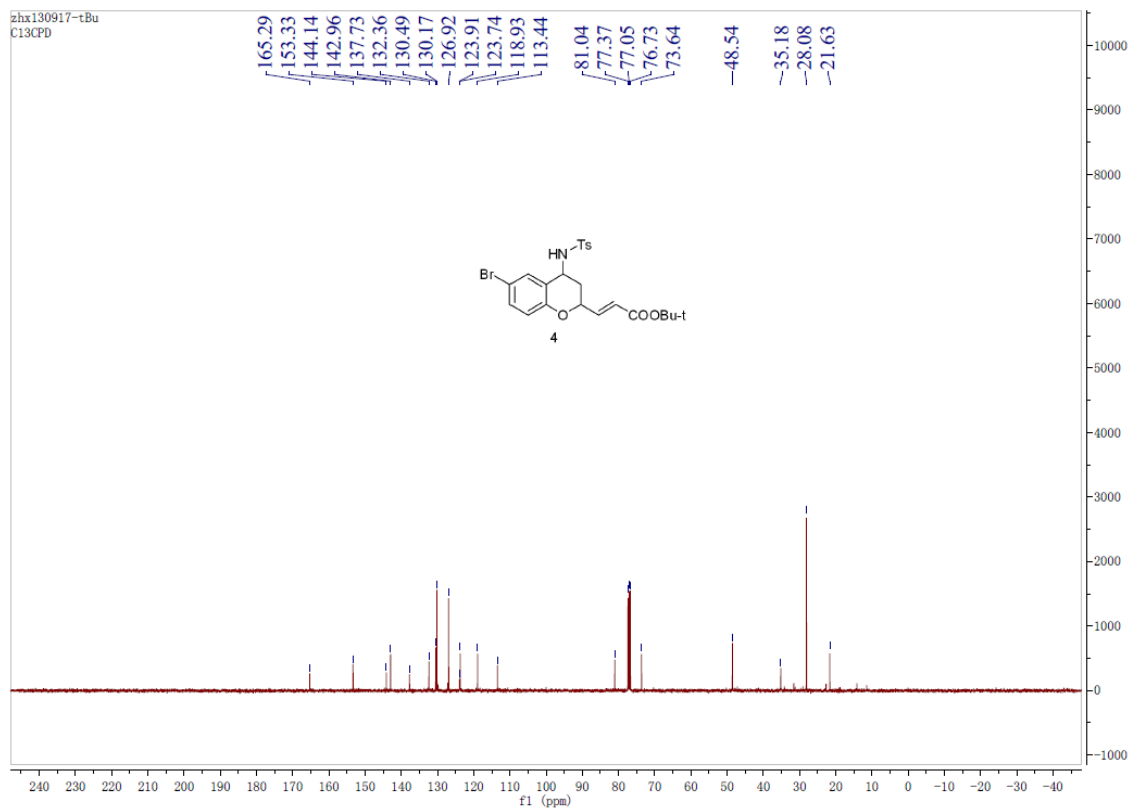

## 8. Crystal structure of 3g

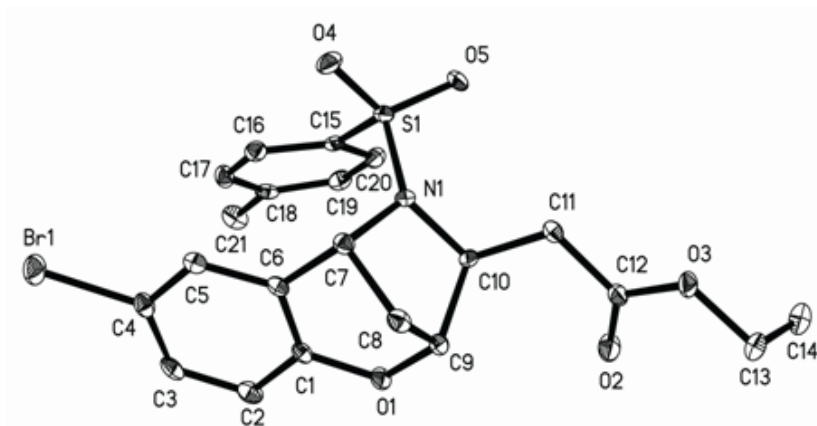

1. S. Andres, G. C. Fu, *Angew.Chem. In. Ed.* 2004, **43**, 3580
2. R. W. Lang, H.-J. Hansen, *Organic Syntheses.* 1990, **62**, 202.
3. B. E. Love, P. S. Raje, T. C. Williams II, *Synlett* 1994, 493.
